# Supplementary material for: Modified rice bran arabinoxylan as a nutraceutical in health and disease—A scoping review with bibliometric analysis
Source: PubMed Central journal article supplement (PMC10470915; doi:10.1371/journal.pone.0290314), 2023-08-31
Supplement: pone.0290314.s001.pdf [file pone.0290314.s001.pdf]

## S1. Supporting Materials for Methods

### S1.1 Search strategy example

#### **Name of the information source and the platform/service provider used**

MEDLINE (via PubMed)

#### **All the search terms to be used (both keywords/text words and index terms should be included) and how they are to be combined using Boolean logic; the use of truncation and wildcards.**

((Modified) OR (Hydroly\*) OR (Fermented) OR (Bioprocessed)) AND (Rice Bran) AND ((arabinoxylan) OR (hemicellulose) OR (polysaccharide) OR (Exo-biopolymer))

OR

((Biobran) OR (MGN-3) OR (Ribraxx) OR (BRM4) OR (RBEP))

#### **Planned limits (date, language, etc.)**

MEDLINE - No limit

#### **Search Conducted On**

27 September 2022

#### **Number of Records**

207

#### **Detail Query**

((("modifiable"[All Fields] OR "modified"[All Fields] OR "modifier"[All Fields] OR "modifiers"[All Fields] OR "modifies"[All Fields] OR "modify"[All Fields] OR "modifying"[All Fields] OR "hydroly\*" [All Fields] OR ("ferment"[All Fields] OR "fermentabilities"[All Fields] OR "fermentability"[All Fields] OR "fermentable"[All Fields] OR "fermentate"[All Fields] OR "fermentated"[All Fields] OR "fermentates"[All Fields] OR "fermentation"[MeSH Terms] OR "fermentation"[All Fields] OR "fermentations"[All Fields] OR "fermentative"[All Fields] OR "fermentatively"[All Fields] OR "fermentator"[All Fields] OR "fermented"[All Fields] OR "fermenter"[All Fields] OR "fermenters"[All Fields] OR "fermenting"[All Fields] OR "fermentation"[All Fields] OR "ferments"[All Fields]) OR "Bioprocessed"[All Fields]) AND (("oryza"[MeSH Terms] OR "oryza"[All Fields] OR "rice"[All Fields]) AND "Bran"[All Fields]) AND ("arabinoxylan"[Supplementary Concept] OR "arabinoxylan"[All Fields] OR "arabinoxylans"[All Fields] OR ("hemicellulose"[Supplementary Concept] OR "hemicellulose"[All Fields] OR "hemicelluloses"[All Fields] OR "hemicellulosic"[All Fields]) OR ("polysaccharid"[All Fields] OR "polysaccharide s"[All Fields] OR "polysaccharides"[MeSH Terms] OR "polysaccharides"[All Fields] OR "polysaccharide"[All Fields] OR "polysaccharidic"[All Fields] OR "polysaccharids"[All Fields]) OR "Exo-biopolymer"[All Fields])) OR ("polysaccharide mgn3"[Supplementary Concept] OR

*Modified Rice Bran Arabinoxylan as a Nutraceutical in Health and Disease – A Scoping Review with Bibliometric Analysis*

---

"polysaccharide mgn3"[All Fields] OR "biobran"[All Fields] OR ("polysaccharide mgn3"[Supplementary Concept] OR "polysaccharide mgn3"[All Fields] OR "mgn 3"[All Fields]) OR "Ribraxx"[All Fields] OR "BRM4"[All Fields] OR "RBEP"[All Fields])

Translations

Modified: "modifiable"[All Fields] OR "modified"[All Fields] OR "modifier"[All Fields] OR "modifiers"[All Fields] OR "modifies"[All Fields] OR "modify"[All Fields] OR "modifying"[All Fields]

Fermented: "ferment"[All Fields] OR "fermentabilities"[All Fields] OR "fermentability"[All Fields] OR "fermentable"[All Fields] OR "fermentate"[All Fields] OR "fermentated"[All Fields] OR "fermentates"[All Fields] OR "fermentation"[MeSH Terms] OR "fermentation"[All Fields] OR "fermentations"[All Fields] OR "fermentative"[All Fields] OR "fermentatively"[All Fields] OR "fermentor"[All Fields] OR "fermented"[All Fields] OR "fermenter"[All Fields] OR "fermenters"[All Fields] OR "fermenting"[All Fields] OR "fermentation"[All Fields] OR "ferments"[All Fields]

Rice: "oryza"[MeSH Terms] OR "oryza"[All Fields] OR "rice"[All Fields]

arabinoxylan: "arabinoxylan"[Supplementary Concept] OR "arabinoxylan"[All Fields] OR "arabinoxylans"[All Fields]

hemicellulose: "hemicellulose"[Supplementary Concept] OR "hemicellulose"[All Fields] OR "hemicelluloses"[All Fields] OR "hemicellulosic"[All Fields]

polysaccharide: "polysaccharid"[All Fields] OR "polysaccharide's"[All Fields] OR "polysaccharides"[MeSH Terms] OR "polysaccharides"[All Fields] OR "polysaccharide"[All Fields] OR "polysaccharidic"[All Fields] OR "polysaccharids"[All Fields]

Biobran: "polysaccharide MGN3"[Supplementary Concept] OR "polysaccharide MGN3"[All Fields] OR "biobran"[All Fields]

MGN-3: "polysaccharide MGN3"[Supplementary Concept] OR "polysaccharide MGN3"[All Fields] OR "mgn 3"[All Fields]

S 1.2. Data extraction instrument

|                                                                |                                                                                                                                                                                                                                                                                                                                                                                                                                |
|----------------------------------------------------------------|--------------------------------------------------------------------------------------------------------------------------------------------------------------------------------------------------------------------------------------------------------------------------------------------------------------------------------------------------------------------------------------------------------------------------------|
| <i>Citation details (APA 7<sup>th</sup>)</i>                   |                                                                                                                                                                                                                                                                                                                                                                                                                                |
| <i>Country</i>                                                 |                                                                                                                                                                                                                                                                                                                                                                                                                                |
| <i>Article Type</i>                                            | Full paper, short communication, abstract only, thesis, book chapter, study protocol, trial registration.                                                                                                                                                                                                                                                                                                                      |
| <i>Study Type</i>                                              | Human / Animal / In vitro / Others<br><br><i>Human: Randomized controlled trials, non-randomized controlled trials, before and after studies and interrupted time-series studies, prospective or retrospective cohort studies, case-control studies, analytical cross-sectional studies, case series, individual case reports and descriptive cross-sectional studies.</i><br><br><i>Trial registration (Human trial only)</i> |
| <i>Context</i>                                                 | <i>Human: Population, sex, age, sample size, health/disease conditions.</i><br><i>Animal: Type, sex, age, sample size, health/disease conditions.</i><br><i>In vitro: Cell lines</i>                                                                                                                                                                                                                                           |
| <i>Methodology / methods</i>                                   |                                                                                                                                                                                                                                                                                                                                                                                                                                |
| <i>Intervention &amp; comparator</i>                           | <i>If applicable, include duration, dosage, mode of administration.</i>                                                                                                                                                                                                                                                                                                                                                        |
| <i>Outcome measures</i>                                        |                                                                                                                                                                                                                                                                                                                                                                                                                                |
| <i>Key findings that relate to the scoping review question</i> |                                                                                                                                                                                                                                                                                                                                                                                                                                |

### S1.3. Co-author weight coefficient scheme

The following formula is used to attribute the weight coefficient  $c(k,n)$ , where  $n$  = number of authors,  $k$ = author order:

$$c(1, n) = c(n,n) = c(\text{corresponding author}, n) = 1.$$

$$c(2,3) = 0.7.$$

For  $n \geq 4, 2 \leq k \leq n - 1$ :

$$c(k,n) = 2(n - k + 1)/(n + 1)(n - 2).$$
