# Supplementary material for: Modified rice bran arabinoxylan as a nutraceutical in health and disease—A scoping review with bibliometric analysis
Source: PubMed Central journal article supplement (PMC10470915; doi:10.1371/journal.pone.0290314), 2023-08-31
Supplement: pone.0290314.s003.pdf [file pone.0290314.s003.pdf]

### S3. Data Tables

#### 1. Article

This table contains data for each included article.

| #                                      | Data Item               | Format        | Description                                                                                                                              |
|----------------------------------------|-------------------------|---------------|------------------------------------------------------------------------------------------------------------------------------------------|
| 1                                      | UID                     | Integer       | Unique article identifier in database                                                                                                    |
| 2                                      | Article ID              | Author (Year) | Unique article identifier in following the APA 7 <sup>th</sup> in-text citation Author (Year) format.                                    |
| 3                                      | No. Author              | Integer       | Number of authors                                                                                                                        |
| 4                                      | Year                    | Year (YYYY)   | Year of publication                                                                                                                      |
| 5                                      | Title                   | Text          | Full article title                                                                                                                       |
| 6                                      | Published In            | Text          | The name of the publication (journal/book/conference, etc.)                                                                              |
| 7                                      | Country                 | Text          | Country of origin. If the authors were from more than one country, the country of origin is where the study or experiment was conducted. |
| 8                                      | Language                | Text          | Language of publication.                                                                                                                 |
| 9                                      | Google Scholar Citation | Integer       | The citation count reported by Google Scholar                                                                                            |
| 9                                      | Article Type            | Selection     | Full paper, Short Communication, Book Chapter, Abstract, Thesis, Study Protocol or Trial Registration.                                   |
| 10                                     | Is Human Study          | Yes/No        | Indicate whether it is a human study.                                                                                                    |
| 11                                     | Is Animal Study         | Yes/No        | Indicate whether it is an animal study.                                                                                                  |
| 12                                     | Is Cell Study           | Yes/No        | Indicate whether it is an in vitro cell study.                                                                                           |
| 13                                     | Is Chemical Analysis    | Yes/No        | Indicate whether it is a chemical analysis study.                                                                                        |
| 14                                     | RBAC Type               | Text          | The name of RBAC used in the study.                                                                                                      |
| 15                                     | RBAC Source             | Text          | The commercial source of RBAC.                                                                                                           |
| <i>Data items for human study only</i> |                         |               |                                                                                                                                          |
| 16                                     | Study Protocol Only     | Yes/No        | Is this article a study protocol?                                                                                                        |
| 17                                     | Clinical Study Type     | Text          | Specify the type of clinical study design, e.g., RCT, non-RCT, before and after study, etc., if relevant.                                |
| 18                                     | Case Report Type        | Selection     | Individual case report or case series, if relevant.                                                                                      |
| 19                                     | Registered Trial?       | Yes/No        | Is this a registered trial?                                                                                                              |
| 20                                     | Trial Registry          | Text          | Name of the trial registry, if registered.                                                                                               |
| 21                                     | Trial Registration no.  | Text          | The unique trial registration number, if registered.                                                                                     |

#### 2. Author

This table contains data for every author of the included article.

| # | Data Item   | Format | Description                                                                                                                   |
|---|-------------|--------|-------------------------------------------------------------------------------------------------------------------------------|
| 1 | Author ID   | Text   | Unique author ID in database                                                                                                  |
| 2 | Full Name   | Text   | Full name of the author                                                                                                       |
| 3 | Affiliation | Text   | Author's affiliating institution. If more than one affiliation is reported, only the primary / latest affiliation is entered. |
| 4 | Country     | Text   | The country where the author conducted the work.                                                                              |

### 3. Authorship

This table specifies the author and article relationship.

| # | Data Item           | Format        | Description                                                                                                                       |
|---|---------------------|---------------|-----------------------------------------------------------------------------------------------------------------------------------|
| 1 | Article ID          | Author (Year) | Unique article identifier in following the APA 7 <sup>th</sup> in-text citation Author (Year) format.                             |
| 2 | Author ID           | Text          | Unique author ID in database                                                                                                      |
| 3 | Author Affiliation  | Text          | Author's affiliating institution. If more than one affiliation is reported, an entry is recorded for each affiliated institution. |
| 4 | Affiliation Country | Text          | The country of the affiliated institution                                                                                         |
| 5 | Is Corresponding?   | Yes / No      | Is this the corresponding author for the article?                                                                                 |
| 6 | Author Order        | Sequential    | A sequential number indicating the author's order in the author list starting from 1.                                             |
| 7 | Weight Coefficient  | Numeral       | See Supplementary S4.                                                                                                             |

### 4. Institution

This table contains data for every author-affiliation of the included article.

| # | Data Item | Format    | Description                                                                                                            |
|---|-----------|-----------|------------------------------------------------------------------------------------------------------------------------|
| 1 | Name      | Text      | Name of an institution                                                                                                 |
| 2 | Country   | Text      | The country where this institution is located                                                                          |
| 3 | Type      | Selection | The institution type being one of Academic, Healthcare, Private Practice, Research Institution, or Commercial Company. |

### 5. Reference

This table captures the internal referencing across the included articles.

| # | Data Item            | Format        | Description                         |
|---|----------------------|---------------|-------------------------------------|
| 1 | Source Article ID    | Author (Year) | The source article.                 |
| 2 | Reference Article ID | Author (Year) | The article being referenced/cited. |

### 6. MeSH

| # | Data Item            | Format        | Description                              |
|---|----------------------|---------------|------------------------------------------|
| 1 | Article ID           | Author (Year) | The source article.                      |
| 2 | MeSHTerms (OnDemand) | Text          | MeSH terms generated from MeSH on Demand |
| 3 | MeSHTerms (PubMed)   | Text          | MeSH terms from PubMed, if available.    |

### 7. Condition-Action-Outcome

*Modified Rice Bran Arabinoxylan as a Nutraceutical in Health and Disease – A Scoping Review with Bibliometric Analysis*

---

This table captures health or disease conditions investigated in each article, the potential beneficial actions, and the positive outcomes reported.

| # | Data Item         | Format        | Description                                                                          |
|---|-------------------|---------------|--------------------------------------------------------------------------------------|
| 1 | Article ID        | Author (Year) | The source article.                                                                  |
| 2 | Study Design      | Selection     | Type of study design which reported the results.                                     |
| 2 | Co-Intervention   | Text          | List of co-intervention with RBAC, e.g., chemotherapy, radiotherapy, etc.            |
| 3 | Condition         | Text          | Name of the health conditions or disease.                                            |
| 4 | Primary Site      | Text          | Primary body site or organ affected by the condition or investigated by the study.   |
| 5 | Secondary Site    | Text          | Secondary body site or organ affected by the condition or investigated by the study. |
| 6 | Beneficial Action | Text          | Beneficial action reported.                                                          |
| 7 | Outcome           | Text          | List of positive outcomes.                                                           |
