# Supplementary material for: Modified rice bran arabinoxylan as a nutraceutical in health and disease—A scoping review with bibliometric analysis
Source: PubMed Central journal article supplement (PMC10470915; doi:10.1371/journal.pone.0290314), 2023-08-31
Supplement: pone.0290314.s004.pdf [file pone.0290314.s004.pdf]

## S4. Additional tables and figures

Table S4.1. The characteristics of all included articles in alphabetic order of the first author's name (excluding trial registrations).

| Article ID                 | Country     | Language | Type       | RBAC Type     | Source | Design   | T# | Condition | Action / Effect                     |
|----------------------------|-------------|----------|------------|---------------|--------|----------|----|-----------|-------------------------------------|
| Ali et al. (2012)          | USA         | English  | Full paper | Biobran MGN-3 | Daiwa  | RCT      | T1 | Healthy   | Immunomodulation                    |
| An (2011)                  | South Korea | Korean   | Thesis     | RBEP/EFR      | Erom   | Animal   | T0 | Cancer    | Anticancer                          |
|                            |             |          |            |               |        | Animal   | T0 | Allergy   | Antiallergy                         |
|                            |             |          |            |               |        | Cell     | T0 | Healthy   | Noncytotoxic                        |
|                            |             |          |            |               |        | Chemical | T0 | Healthy   | Antioxidant                         |
| Badr El-Din et al. (2008)  | Egypt       | English  | Full paper | Biobran MGN-3 | Daiwa  | Animal   | T0 | Cancer    | Anticancer                          |
| Badr El-Din et al. (2016a) | Egypt       | English  | Full paper | Biobran MGN-3 | Daiwa  | Animal   | T0 | Cancer    | Chemoprevention                     |
| Badr El-Din et al. (2016b) | Egypt       | English  | Full paper | Biobran MGN-3 | Daiwa  | Animal   | T0 | Cancer    | Synergistic anticancer effect       |
| Badr El-Din et al. (2016c) | Egypt       | English  | Full paper | Biobran MGN-3 | Daiwa  | Animal   | T0 | Cancer    | Chemoprevention<br>Hepatoprotection |
| Badr El-Din et al. (2019)  | Egypt       | English  | Full paper | Biobran MGN-3 | Daiwa  | Animal   | T0 | Cancer    | Synergistic anticancer effect       |
| Badr El-Din et al. (2020)  | Egypt       | English  | Full paper | Biobran MGN-3 | Daiwa  | Animal   | T0 | Cancer    | Chemoprevention<br>Hepatoprotection |
| Bae et al. (2004)          | South Korea | Korean   | Full paper | Biobran MGN-3 | Daiwa  | Animal   | T0 | Healthy   | Immunomodulation                    |
|                            |             |          |            |               |        | Animal   | T0 | Cancer    | Anticancer                          |
|                            |             |          |            |               |        | Animal   | T0 | Allergy   | Antiallergy                         |
| Bang et al. (2010)         | Vietnam     | English  | Full paper | Biobran MGN-3 | Daiwa  | RCT      | T2 | Cancer    | Synergistic anticancer effect       |
| Brush et al. (2010)        | USA         | English  | Abstract   | Biobran MGN-3 | Daiwa  | Cell     | T0 | Cancer    | Anticancer                          |
| Cadden et al. (2020)       | USA         | English  | Abstract   | Biobran MGN-3 | Daiwa  | RCT      | T1 | HIV       | No significant effect               |
| Chae et al. (2004)         | South Korea | Korean   | Full paper | Biobran MGN-3 | Daiwa  | Cell     | T0 | Healthy   | Immunomodulation                    |
| Choi et al. (2014)         | South Korea | English  | Full paper | RBEP/EFR      | Erom   | RCT      | T1 | Healthy   | Immunomodulation                    |
| Cholujova et al. (2009)    | Slovakia    | English  | Full paper | Biobran MGN-3 | Daiwa  | Cell     | T0 | Healthy   | Immunomodulation                    |
| Cholujova et al. (2013)    | Slovakia    | English  | Full paper | Biobran MGN-3 | Daiwa  | RCT      | T1 | Cancer    | Immunomodulation                    |

*Modified Rice Bran Arabinoxylan as a Nutraceutical in Health and Disease – A Scoping Review with Bibliometric Analysis*

|                               |             |          |            |               |             |         |    |                           |                                  |
|-------------------------------|-------------|----------|------------|---------------|-------------|---------|----|---------------------------|----------------------------------|
| Chung et al. (2015)           | South Korea | English  | Full paper | BPP/FF        | STR Biotech | Cell    | T0 | Healthy                   | Hepatoprotection                 |
|                               |             |          |            |               |             | Animal  | T0 | Hepatitis / Liver Disease | Hepatoprotection                 |
| Daizo et al. (2001)           | Japan       | Japanese | Abstract   | Biobran MGN-3 | Daiwa       | Animal  | T0 | Hepatitis / Liver Disease | Hepatoprotection                 |
| Egashira et al. (2013)        | Japan       | English  | Abstract   | Biobran MGN-3 | Daiwa       | Animal  | T0 | Hepatitis / Liver Disease | Hepatoprotection                 |
| Elsaid et al. (2018)          | Egypt       | English  | Full paper | Biobran MGN-3 | Daiwa       | RCT     | T1 | Geriatric                 | Immunomodulation                 |
| Elsaid et al. (2020)          | Egypt       | English  | Full paper | Biobran MGN-3 | Daiwa       | RCT     | T1 | Geriatric                 | Psychoneuroimmuno-<br>modulation |
| Elsaid et al. (2021)          | Egypt       | English  | Full paper | Biobran MGN-3 | Daiwa       | RCT     | T2 | Cold / Flu                | Antiflu                          |
|                               |             |          |            |               |             |         |    | Geriatric                 | Antiflu                          |
| Endo and Kanbayashi (2003)    | Canada      | English  | Short Comm | Biobran MGN-3 | Daiwa       | Animal  | T0 | Healthy                   | Antiwasting                      |
| Ghoneum and Abedi (2004)      | USA         | English  | Full paper | Biobran MGN-3 | Daiwa       | Animal  | T0 | Geriatric                 | Immunomodulation                 |
|                               |             |          |            |               |             | Cell    | T0 | Geriatric                 | Immunomodulation                 |
| Ghoneum and Agrawal (2011)    | USA         | English  | Full paper | Biobran MGN-3 | Daiwa       | Cell    | T0 | Healthy                   | Immunomodulation                 |
| Ghoneum and Agrawal (2014)    | USA         | English  | Full paper | Biobran MGN-3 | Daiwa       | Cell    | T0 | Healthy                   | Immunomodulation                 |
| Ghoneum and Brown (1999)      | USA         | English  | Chapter    | Biobran MGN-3 | Daiwa       | Bef-Aft | T1 | Cancer                    | Immunomodulation                 |
| Ghoneum and El Sayed (2021)   | USA         | English  | Full paper | Biobran MGN-3 | Daiwa       | Animal  | T0 | Alzheimer's disease       | Memory enhancer<br>Antioxidant   |
| Ghoneum and Gollapudi (2003)  | USA         | English  | Full paper | Biobran MGN-3 | Daiwa       | Cell    | T0 | Cancer                    | Anticancer                       |
| Ghoneum and Gollapudi (2005a) | USA         | English  | Full paper | Biobran MGN-3 | Daiwa       | Cell    | T0 | Cancer                    | Synergistic anticancer effect    |
| Ghoneum and Gollapudi (2005b) | USA         | English  | Full paper | Biobran MGN-3 | Daiwa       | Cell    | T0 | Cancer                    | Synergistic anticancer effect    |
| Ghoneum and Gollapudi (2011)  | USA         | English  | Full paper | Biobran MGN-3 | Daiwa       | Cell    | T0 | Cancer                    | Synergistic anticancer effect    |
| Ghoneum and Jewett (2000)     | USA         | English  | Full paper | Biobran MGN-3 | Daiwa       | Cell    | T0 | Healthy                   | Immunomodulation                 |
| Ghoneum and Matsuura (2004)   | USA         | English  | Full paper | Biobran MGN-3 | Daiwa       | Cell    | T0 | Healthy                   | Immunomodulation                 |
| Ghoneum (1998a)               | USA         | English  | Full paper | Biobran MGN-3 | Daiwa       | Cell    | T1 | HIV                       | Antiretroviral                   |
| Ghoneum (1998b)               | USA         | English  | Full paper | Biobran MGN-3 | Daiwa       | Bef-Aft | T0 | Healthy                   | Immunomodulation                 |
| Ghoneum (1999)                | USA         | English  | Abstract   | Biobran MGN-3 | Daiwa       | Bef-Aft | T1 | Cancer                    | Immunomodulation                 |
|                               |             |          |            |               |             |         |    | Chemical exposure         | Immunomodulation                 |
| Ghoneum et al. (2000)         | USA         | English  | Abstract   | Biobran MGN-3 | Daiwa       | Cell    | T0 | Cancer                    | Anticancer                       |

*Modified Rice Bran Arabinoxylan as a Nutraceutical in Health and Disease – A Scoping Review with Bibliometric Analysis*

|                              |             |          |            |               |       |             |    |                           |                                          |
|------------------------------|-------------|----------|------------|---------------|-------|-------------|----|---------------------------|------------------------------------------|
| Ghoneum et al. (2008)        | USA         | English  | Full paper | Biobran MGN-3 | Daiwa | Cell        | T0 | Healthy                   | Antibacterial                            |
| Ghoneum et al. (2013)        | USA         | English  | Full paper | Biobran MGN-3 | Daiwa | Animal      | T0 | Healthy                   | Radioprotection<br>Antioxidant           |
| Ghoneum et al. (2014)        | USA         | English  | Full paper | Biobran MGN-3 | Daiwa | Cell        | T0 | Cancer                    | Synergistic anticancer effect            |
| Giese et al. (2008)          | USA         | English  | Full paper | Biobran MGN-3 | Daiwa | Animal      | T0 | Healthy                   | Immunomodulation                         |
| Gollapudi and Ghoneum (2008) | USA         | English  | Full paper | Biobran MGN-3 | Daiwa | Cell        | T0 | Cancer                    | Synergistic anticancer effect            |
| Golombick et al. (2016)      | Australia   | English  | Full paper | Biobran MGN-3 | Daiwa | Bef-Aft     | T1 | Cancer                    | Immunomodulation                         |
| Hajtó and Kirsch (2013)      | Hungary     | English  | Full paper | Biobran MGN-3 | Daiwa | Case Rep    | T1 | Cancer                    | Synergistic anticancer effect            |
| Hajtó (2017)                 | Hungary     | English  | Full paper | Biobran MGN-3 | Daiwa | Case Series | T1 | Cancer                    | Synergistic anticancer effect            |
| Hajtó (2018)                 | Hungary     | English  | Full paper | Biobran MGN-3 | Daiwa | Case Series | T1 | Cancer                    | Synergistic anticancer effect            |
| Hajtó et al. (2015)          | Hungary     | English  | Full paper | Biobran MGN-3 | Daiwa | Case Series | T1 | Cancer                    | Synergistic anticancer effect            |
| Hajtó et al. (2016a)         | Hungary     | English  | Full paper | Biobran MGN-3 | Daiwa | Case Series | T1 | Cancer                    | Synergistic anticancer effect            |
| Hajtó et al. (2016b)         | Hungary     | English  | Full paper | Biobran MGN-3 | Daiwa | Cross-Sect  | T1 | Cancer                    | Psychoneuroimmuno-<br>modulation         |
| Hoshino et al. (2010)        | Japan       | English  | Full paper | Biobran MGN-3 | Daiwa | Cell        | T0 | Healthy                   | Antiinflammation                         |
| Ichihashi (2004)             | Japan       | Japanese | Full paper | Biobran MGN-3 | Daiwa | Case Rep    | T1 | Rheumatism                | Antirheumatic effect<br>Antiinflammation |
| Itoh et al. (2015)           | Japan       | English  | Full paper | Biobran MGN-3 | Daiwa | RCT         | T1 | Cancer<br>Gastroenteritis | Immunomodulation<br>Gastroprotection     |
| Jacoby et al. (2001)         | USA         | English  | Full paper | Biobran MGN-3 | Daiwa | Animal      | T0 | Healthy                   | Chemoprotection<br>Gastroprotection      |
| Kaketani (2004)              | Japan       | Japanese | Full paper | Biobran MGN-3 | Daiwa | Case Series | T1 | Cancer                    | Synergistic anticancer effect            |
| Kambayashi and Endo (2002)   | Canada      | Japanese | Abstract   | Biobran MGN-3 | Daiwa | Animal      | T0 | Allergy                   | Antiasthma<br>Antiinflammation           |
| Kamiya et al. (2014)         | Japan       | English  | Full paper | Biobran MGN-3 | Daiwa | RCT         | T1 | Irritable bowel syndrome  | Immunomodulation                         |
| Kang et al. (2022)           | South Korea | Korean   | Full paper | RBEP/EFR      | Erom  | Cell        | T0 | Healthy                   | Immunomodulation                         |
| Kawai (2004)                 | Japan       | Japanese | Full paper | Biobran MGN-3 | Daiwa | Case Series | T1 | Cancer                    | Synergistic anticancer effect            |

*Modified Rice Bran Arabinoxylan as a Nutraceutical in Health and Disease – A Scoping Review with Bibliometric Analysis*

|                          |             |         |            |                           |             |             |    |                           |                               |
|--------------------------|-------------|---------|------------|---------------------------|-------------|-------------|----|---------------------------|-------------------------------|
| Kenyon (2001)            | UK          | English | Full paper | Biobran MGN-3             | Daiwa       | Bef-Aft     | T1 | Chronic fatigue syndrome  | Antifatigue                   |
| Kim D.J. et al. (2011a)  | S.Korea     | Korean  | Full paper | Fermented SuperC3GHi bran | Erom        | Animal      | T0 | Cancer                    | Anticancer                    |
|                          |             |         |            |                           |             | Animal      | T0 | Allergy                   | Antiinflammation              |
|                          |             |         |            |                           |             | Cell        | T0 | Healthy                   | Antiallergy                   |
| Kim D.J. et al. (2011b)  | South Korea | Korean  | Full paper | Fermented black rice bran | STR Biotech | Animal      | T0 | Healthy                   | Immunomodulation              |
| Kim H.Y. et al. (2005)   | South Korea | English | Full paper | RBEP/EFR                  | Erom        | Animal      | T0 | Healthy                   | Immunomodulation              |
|                          | South Korea |         |            |                           |             | Cell        | T0 | Healthy                   | Immunomodulation              |
| Kim H.Y. et al. (2007)   | South Korea | English | Full paper | RBEP/EFR                  | Erom        | Animal      | T0 | Cancer                    | Anticancer                    |
| Kim J.M. et al. (2020)   | South Korea | English | Full paper | ONS                       | Erom        | NRCT        | T1 | Cancer                    | Psychoneuroimmuno-modulation  |
| Kim S.P. et al. (2013)   | South Korea | English | Full paper | BPP/FF                    | STR Biotech | Cell        | T0 | Healthy                   | Immunomodulation              |
|                          | South Korea |         |            |                           |             | Animal      | T0 | Endotoxemia               | Antioxidant                   |
|                          | South Korea |         |            |                           |             | Animal      | T0 | Hepatitis / Liver Disease | Hepatoprotection              |
| Kim S.P. et al. (2014)   | South Korea | English | Full paper | BPP/FF                    | STR Biotech | Cell        | T0 | Healthy                   | Immunomodulation              |
|                          | South Korea |         |            |                           |             | Animal      | T0 | Bacterial infection       | Antibacterial                 |
| Kim S.P. et al. (2018)   | South Korea | English | Full paper | BPRBE                     | STR Biotech | Cell        | T0 | Healthy                   | Immunomodulation              |
|                          |             |         |            |                           |             | Animal      | T0 | Gastroenteritis           | Antibacterial                 |
| Lewis et al. (2020a)     | USA         | English | Full paper | Biobran MGN-3             | Daiwa       | RCT         | T1 | HIV                       | Endothelial improvement       |
| Lewis et al. (2020b)     | USA         | English | Full paper | Biobran MGN-3             | Daiwa       | RCT         | T1 | HIV                       | Immunomodulation              |
| Lewis et al. (2020c)     | USA         | English | Full paper | Biobran MGN-3             | Daiwa       | RCT         | T1 | Hepatitis / Liver Disease | Hepatoprotection              |
| Lissoni et al. (2008)    | Italy       | English | Full paper | Biobran MGN-3             | Daiwa       | Bef-Aft     | T1 | Cancer                    | Immunomodulation              |
| Markus et al. (2006)     | USA         | English | Full paper | Biobran MGN-3             | Daiwa       | Case Series | T1 | Cancer                    | Anticancer                    |
| Masood et al. (2013)     | Pakistan    | English | Full paper | Biobran MGN-3             | Daiwa       | RCT         | T1 | Cancer                    | Psychoneuroimmuno-modulation  |
| McDermott et al. (2006)  | UK          | English | Full paper | Biobran MGN-3             | Daiwa       | RCT         | T1 | Chronic fatigue syndrome  | No significant effect         |
| Meshitsuka (2013)        | Japan       | English | Full paper | Biobran MGN-3             | Daiwa       | Case Series | T1 | Cancer                    | Synergistic anticancer effect |
| Miura et al. (2004/2013) | Japan       | English | Chapter    | Biobran MGN-3             | Daiwa       | Cell        | T0 | Healthy                   | Immunomodulation              |
| Noaman et al. (2008)     | Egypt       | English | Full paper | Biobran MGN-3             | Daiwa       | Animal      | T0 | Cancer                    | Anticancer                    |

*Modified Rice Bran Arabinoxylan as a Nutraceutical in Health and Disease – A Scoping Review with Bibliometric Analysis*

|                              |             |          |            |               |       |                |          |                                       |                                                                                      |
|------------------------------|-------------|----------|------------|---------------|-------|----------------|----------|---------------------------------------|--------------------------------------------------------------------------------------|
| Ohara et al. (2000)          | Japan       | English  | Full paper | Biobran MGN-3 | Daiwa | Animal         | T0       | Diabetes mellitus                     | Antioxidant<br>Antihyperlipidemic effect<br>Taste influencer                         |
| Ohara et al. (2002)          | Japan       | English  | Full paper | Biobran MGN-3 | Daiwa | Animal         | T0       | Diabetes mellitus                     | Antihyperglycemic effect<br>Antihyperlipidemic effect                                |
| Okamura (2004)               | Japan       | Japanese | Full paper | Biobran MGN-3 | Daiwa | Case Rep       | T1       | Cancer                                | Synergistic anticancer effect<br>Immunomodulation<br>Hepatoprotection                |
| Ooi et al. (2020)            | Australia   | English  | Protocol   | Biobran MGN-3 | Daiwa | NA             | T1       | NA                                    | NA                                                                                   |
| Pérez-Martínez et al. (2015) | Spain       | English  | Full paper | Biobran MGN-3 | Daiwa | Cell<br>Animal | T0<br>T0 | Healthy<br>Cancer                     | Immunomodulation<br>Immunomodulation                                                 |
| Pescatore et al. (2022)      | USA         | English  | Full paper | Biobran MGN-3 | Daiwa | Bef-Aft        | T1       | Cancer                                | Antimetastatic effect                                                                |
| Petrovics et al. (2016)      | Hungary     | English  | Full paper | Biobran MGN-3 | Daiwa | RCT            | T1       | Chronic fatigue<br>syndrome<br>Cancer | Antifatigue<br><br>Psychoneuroimmuno-<br>modulation                                  |
| Salama et al. (2016)         | Egypt       | English  | Full paper | Biobran MGN-3 | Daiwa | RCT            | T1       | Hepatitis / Liver Disease             | Hepatoprotection<br>Antiviral                                                        |
| Sudo et al. (2001)           | Japan       | Japanese | Full paper | Biobran MGN-3 | Daiwa | Animal         | T0       | Endotoxemia                           | Antiinflammation                                                                     |
| Takahara and Sano (2004)     | Japan       | Japanese | Full paper | Biobran MGN-3 | Daiwa | RCT            | T2       | Cancer                                | Psychoneuroimmuno-<br>modulation                                                     |
| Tan and Flores (2020)        | Philippines | English  | Full paper | Biobran MGN-3 | Daiwa | RCT            | T2       | Cancer                                | Synergistic anticancer effect<br>Radioprotection<br>Psychoneuroimmuno-<br>modulation |
| Tazawa et al. (2000)         | Japan       | English  | Full paper | Biobran MGN-3 | Daiwa | Chemical       | T0       | Oxidative stress                      | Antioxidant                                                                          |
| Tazawa et al. (2003)         | Japan       | Japanese | Full paper | Biobran MGN-3 | Daiwa | RCT            | T1       | Cold / Flu<br>Geriatric               | Antiflu<br>Immunomodulation                                                          |
| Tsunekawa (2004)             | Japan       | Japanese | Full paper | Biobran MGN-3 | Daiwa | Case Rep       | T1       | Cancer                                | Synergistic anticancer effect<br>Psychoneuroimmuno-<br>modulation                    |
| Yamada et al. (2002)         | Japan       | Japanese | Abstract   | Biobran MGN-3 | Daiwa | Animal         | T0       | Hepatitis / Liver Disease             | Hepatoprotection                                                                     |

*Modified Rice Bran Arabinoxylan as a Nutraceutical in Health and Disease – A Scoping Review with Bibliometric Analysis*

---

|                      |             |         |            |               |       |        |    |                           |                                                    |
|----------------------|-------------|---------|------------|---------------|-------|--------|----|---------------------------|----------------------------------------------------|
| Yu et al. (2004)     | South Korea | English | Full paper | RBEP/EFR      | Erom  | Cell   | T0 | Healthy                   | Immunomodulation                                   |
| Zhao et al. (2020)   | China       | English | Full paper | Biobran MGN-3 | Daiwa | Animal | T0 | Gastroenteritis           | Radioprotection<br>Antiinflammation<br>Antioxidant |
| Zheng et al. (2012a) | Japan       | English | Full paper | Biobran MGN-3 | Daiwa | Animal | T0 | Hepatitis / Liver Disease | Hepatoprotection<br>Antiinflammation               |
| Zheng et al. (2012b) | Japan       | English | Full paper | Biobran MGN-3 | Daiwa | Animal | T0 | Hepatitis / Liver Disease | Hepatoprotection<br>Antiinflammation               |
| Zhu et al. (2017)    | Japan       | English | Full paper | Biobran MGN-3 | Daiwa | Cell   | T0 | Healthy                   | Antiangiogenesis                                   |

**Abbreviations:** Bef-Aft, before and after study; BPP/FF, bioprocessed polysaccharide or fermented black rice bran; BPRBE, bioprocessed rice bran extract; Cross-Sect, descriptive cross-sectional study; NA, not available; NRCT, non-randomised controlled trial; ONS, oral nutritional supplement; RBEP/EFR, rice bran bio-exopolymer or Erom’s fermented rice bran; Rep, report; RCT, randomised controlled trial; T#, translational research spectrum classification (T1 – T4); UK, United Kingdom; USA, United States of America.

---

Table S4.2. The research output by country according to article count and authors' total weighted coefficient (TWC).

| Article | Ranking By Author | TWC | Country     | No. Authors | No. Institutions | Publishing Period | Count by Article's Country (% Total) <sup>1</sup> | Count by Author's Country (% Total) <sup>2</sup> | Author's TWC |
|---------|-------------------|-----|-------------|-------------|------------------|-------------------|---------------------------------------------------|--------------------------------------------------|--------------|
| 1       | 1                 | 1   | USA         | 65          | 19               | 1988 - 2022       | 29 (29.59%)                                       | 43 (43.88%)                                      | 78.04        |
| 2       | 2                 | 2   | Japan       | 80          | 23               | 2000 - 2017       | 22 (22.45%)                                       | 27 (27.55%)                                      | 56.71        |
| 3       | 3                 | 3   | South Korea | 44          | 18               | 2004 - 2022       | 15 (15.31%)                                       | 15 (15.31%)                                      | 42.16        |
| 4       | 4                 | 4   | Egypt       | 16          | 5                | 2008 - 2021       | 11 (11.22%)                                       | 14 (14.29%)                                      | 22.54        |
| 5       | 5                 | 5   | Hungary     | 12          | 1                | 2013 - 2018       | 7 (7.14%)                                         | 7 (7.14%)                                        | 14.37        |
| 6       | 7                 | 6   | Australia   | 12          | 7                | 2016 - 2020       | 2 (2.04%)                                         | 2 (2.04%)                                        | 6.77         |
| 6       | 7                 | 9   | Canada      | 2           | 1                | 2002 - 2003       | 2 (2.04%)                                         | 2 (2.04%)                                        | 4.00         |
| 6       | 6                 | 8   | UK          | 7           | 6                | 2001 - 2015       | 2 (2.04%)                                         | 3 (3.06%)                                        | 4.05         |
| 6       | 7                 | 7   | Slovakia    | 8           | 2                | 2009 - 2013       | 2 (2.04%)                                         | 2 (2.04%)                                        | 5.70         |
| 7       | 7                 | 10  | China       | 5           | 4                | 2015 - 2020       | 1 (1.02%)                                         | 2 (2.04%)                                        | 3.00         |
| 7       | 8                 | 12  | Italy       | 11          | 4                | 2008 - 2008       | 1 (1.02%)                                         | 1 (1.02%)                                        | 2.00         |
| 7       | 8                 | 11  | Pakistan    | 3           | 1                | 2013 - 2013       | 1 (1.02%)                                         | 1 (1.02%)                                        | 2.70         |
| 7       | 8                 | 12  | Philippines | 2           | 1                | 2020 - 2020       | 1 (1.02%)                                         | 1 (1.02%)                                        | 2.00         |
| 7       | 8                 | 15  | Spain       | 8           | 4                | 2015 - 2015       | 1 (1.02%)                                         | 1 (1.02%)                                        | 1.73         |
| 7       | 8                 | 14  | Vietnam     | 8           | 1                | 2010 - 2010       | 1 (1.02%)                                         | 1 (1.02%)                                        | 1.90         |
| 7       | 8                 | 17  | Germany     | 4           | 1                | 2015 - 2015       | 1 (1.02%)                                         | 1 (1.02%)                                        | 1.22         |
| -       | 8                 | 18  | Iraq        | 1           | 1                | 2019 - 2019       | 0 (0.00%)                                         | 1 (1.02%)                                        | 0.40         |
| -       | 7                 | 16  | Switzerland | 1           | 1                | 2013 - 2015       | 0 (0.00%)                                         | 2 (2.04%)                                        | 1.33         |

**Note:** <sup>1</sup> An article's country of origin is based on where the study is being conducted or the first author's country.

<sup>2</sup> The count by author's country is based on co-authorship, with all co-authors' countries counting the same article as research output.

*Table S4.3. Funding statement from all included articles.*

| <b>ArticleID</b>           | <b>Funding Statement</b>                                                                                                                                                                                                                                                                                                                     |
|----------------------------|----------------------------------------------------------------------------------------------------------------------------------------------------------------------------------------------------------------------------------------------------------------------------------------------------------------------------------------------|
| Ali et al. (2012)          | This study was supported by a gift from Daiwa Pharmaceutical Inc., Tokyo, Japan, which is the manufacturer of RBAC and research and training funds from the Laboratory for Clinical and Biological Studies at the University of Miami, Miller School of Medicine. Daiwa Pharmaceutical Inc. did not participate in the design of this study. |
| An (2011)                  | Not disclosed                                                                                                                                                                                                                                                                                                                                |
| Badr El-Din et al. (2008)  | We thank Daiwa Pharmaceutical Co. LTD, Tokyo, Japan, for the financial support of this project.                                                                                                                                                                                                                                              |
| Badr El-Din et al. (2016a) | This work was supported by Diawa Pharmaceutical Co Ltd, Tokyo, Japan; Grant #T0099108 (M. Ghoneum); and by NIH-NIMHD Grants U54MD007598 (formerly U54RR026138) and S21 MD000103 (D. Pan).                                                                                                                                                    |
| Badr El-Din et al. (2016b) | The authors would like to acknowledge Daiwa Pharmaceutical Co. Ltd., Tokyo, Japan, for the financial support of this project, Grant #T0099108.                                                                                                                                                                                               |
| Badr El-Din et al. (2016c) | Not disclosed                                                                                                                                                                                                                                                                                                                                |
| Badr El-Din et al. (2019)  | Not disclosed                                                                                                                                                                                                                                                                                                                                |
| Badr El-Din et al. (2020)  | Partial support was provided by Daiwa Pharmaceutical Co., Ltd., Tokyo, Japan.                                                                                                                                                                                                                                                                |
| Bae et al. (2004)          | This study was carried out by the support of the research fund of the Institute of Life Science of EromLife.                                                                                                                                                                                                                                 |
| Bang et al. (2010)         | Not disclosed                                                                                                                                                                                                                                                                                                                                |
| Brush et al. (2010)        | Not disclosed                                                                                                                                                                                                                                                                                                                                |
| Cadden et al. (2020)       | Not disclosed                                                                                                                                                                                                                                                                                                                                |
| Chae et al. (2004)         | This study was supported by research funds from the Erom Life Institute of Life Sciences.                                                                                                                                                                                                                                                    |
| Choi et al. (2014)         | This work was supported by “Food Functionality Evaluation program” under the Ministry of Agriculture, Food and Rural Affairs, and partly Korea Food Research Institute and Erom.                                                                                                                                                             |
| Cholujova et al. (2009)    | This work was supported by a commercial grant from Daiwa Pharmaceutical Co. Ltd.                                                                                                                                                                                                                                                             |
| Cholujova et al. (2013)    | The study was supported by research funding from Daiwa Pharmaceutical to J.S.                                                                                                                                                                                                                                                                |
| Chung et al. (2015)        | This study was supported by grants from the Republic of Korea’s Small and Medium Business Administration (SMBA) (S1061057).                                                                                                                                                                                                                  |
| Daizo et al. (2001)        | Not disclosed                                                                                                                                                                                                                                                                                                                                |
| Egashira et al. (2013)     | Not disclosed                                                                                                                                                                                                                                                                                                                                |



|                             |                                                                                                                                                                                                                                                             |
|-----------------------------|-------------------------------------------------------------------------------------------------------------------------------------------------------------------------------------------------------------------------------------------------------------|
| Elsaid et al. (2018)        | The authors would like to acknowledge Daiwa Pharmaceutical Co., Ltd., Tokyo, Japan, for supplying Biobran/MGN-3 for this study. This study was supported in part by NIH-NIMHD grant nos. U54MD007598 and NIH/NCATS grant nos. UL1TR000124 and S21 MD000103. |
| Elsaid et al. (2020)        | The authors would like to thank Daiwa Pharmaceutical Co., Ltd., Tokyo, Japan for providing Biobran/MGN-3.                                                                                                                                                   |
| Elsaid et al. (2021)        | This research received no external funding. The authors gratefully acknowledge Daiwa Pharmaceutical Co., Ltd. for providing Biobran/MGN-3.                                                                                                                  |
| Endo & Kanbayashi (2003)    | Not disclosed                                                                                                                                                                                                                                               |
| Ghoneum & Abedi (2004)      | Not disclosed                                                                                                                                                                                                                                               |
| Ghoneum & Agrawal (2011)    | Not disclosed                                                                                                                                                                                                                                               |
| Ghoneum & Agrawal (2014)    | This work was supported by grant #C0030300 from Daiwa Pharmaceutical Co., Ltd., Japan.                                                                                                                                                                      |
| Ghoneum & Brown (1999)      | Not disclosed                                                                                                                                                                                                                                               |
| Ghoneum & El Sayed (2021)   | Biobran/MGN-3 was provided by Daiwa Pharm. Co., Ltd, Japan. This work was funded by Daiwa Pharmaceutical Co., Ltd., Tokyo, Japan; Grant #T0099108.                                                                                                          |
| Ghoneum & Gollapudi (2003)  | This work was supported by a grant from Daiwa Pharmaceutical Company, Tokyo, Japan.                                                                                                                                                                         |
| Ghoneum & Gollapudi (2005a) | The authors would also like to thank Daiwa Pharmaceutical Co. LTD, Tokyo, Japan for the financial support of this project.                                                                                                                                  |
| Ghoneum & Gollapudi (2005b) | The authors would also like to thank Daiwa Pharmaceutical Co., Tokyo, Japan, Ltd., for the financial support of this project.                                                                                                                               |
| Ghoneum & Gollapudi (2011)  | Not disclosed                                                                                                                                                                                                                                               |
| Ghoneum & Jewett (2000)     | Not disclosed                                                                                                                                                                                                                                               |
| Ghoneum & Matsuura (2004)   | This work was supported by grant #D22988 from Daiwa Pharmaceutical Co., LTD. Tokyo, Japan.                                                                                                                                                                  |
| Ghoneum (1998b)             | Not disclosed                                                                                                                                                                                                                                               |
| Ghoneum (1998a)             | Not disclosed                                                                                                                                                                                                                                               |
| Ghoneum (1999)              | Not disclosed                                                                                                                                                                                                                                               |
| Ghoneum et al. (2000)       | MGN-3, commercially known as Bio Bran, was provided by Daiwa Pharmaceuticals Company. Ltd., Tokyo, Japan. Supported in part by VA Medical Research Funds and by funds provided by Daiwa Pharmaceuticals Company, Ltd.                                       |
| Ghoneum et al. (2013)       | This work was supported by Daiwa Pharmaceutical Co. Ltd, Tokyo, Japan; Grant #T0099108.                                                                                                                                                                     |
| Ghoneum et al. (2014)       | The Authors would like to acknowledge Daiwa Pharmaceutical Co. Ltd., Tokyo, Japan, for the financial support of this project.                                                                                                                               |

|                            |                                                                                                                                                                                                                                                                       |
|----------------------------|-----------------------------------------------------------------------------------------------------------------------------------------------------------------------------------------------------------------------------------------------------------------------|
| Ghoneum et al. (2008)      | This work was supported by grant #D22988 from Daiwa Pharmaceutical Co. Ltd., Tokyo, Japan.                                                                                                                                                                            |
| Giese et al. (2008)        | Not disclosed                                                                                                                                                                                                                                                         |
| Gollapudi & Ghoneum (2008) | The authors would like to acknowledge Daiwa Pharmaceutical Co. Ltd., Tokyo, Japan, for the financial support of this project.                                                                                                                                         |
| Golombick et al. (2016)    | Terry Golombick received partial funding support during the study period. The other authors received no financial support. The publication costs are borne by Biomedica.                                                                                              |
| Hajtó & Kirsch (2013)      | Not disclosed                                                                                                                                                                                                                                                         |
| Hajtó (2017)               | Not disclosed                                                                                                                                                                                                                                                         |
| Hajtó (2018)               | Not disclosed                                                                                                                                                                                                                                                         |
| Hajtó et al. (2015)        | The authors thank Mrs. Cornelia van den Bergh (for her grants to support this research).                                                                                                                                                                              |
| Hajtó et al. (2016a)       | The authors thank Mrs. Cornelia van den Bergh (for her grants to support this research).                                                                                                                                                                              |
| Hajtó et al. (2016b)       | Not disclosed                                                                                                                                                                                                                                                         |
| Hoshino et al. (2010)      | Not disclosed                                                                                                                                                                                                                                                         |
| Ichihashi (2004)           | Not disclosed                                                                                                                                                                                                                                                         |
| Itoh et al. (2015)         | The authors deeply appreciate Daiwa Pharmaceutical Co., Ltd., the manufacturer of both the HRB and placebo foods, which were provided free of charge.                                                                                                                 |
| Jacoby et al. (2001)       | Not disclosed                                                                                                                                                                                                                                                         |
| Kaketani (2004)            | Not disclosed                                                                                                                                                                                                                                                         |
| Kambayashi & Endo (2002)   | Not disclosed                                                                                                                                                                                                                                                         |
| Kamiya et al. (2014)       | They also thank Daiwa Pharmaceutical Co. Ltd. for supplying the powder of both Biobran and placebo and for the assistance of this paper submission. This study was supported, in part, by a grant of Japanese Society of Psychosomatic Medicine on Digestive Disease. |
| Kang et al. (2022)         | Not disclosed                                                                                                                                                                                                                                                         |
| Kawai (2004)               | Not disclosed                                                                                                                                                                                                                                                         |
| Kenyon (2001)              | Not disclosed                                                                                                                                                                                                                                                         |
| Kim D.J. et al. (2011b)    | Not disclosed                                                                                                                                                                                                                                                         |
| Kim D.J. et al. (2011a)    | This study was funded by the Institute of Technology Planning and Evaluation (IPET) for Food, Agriculture, Forestry and Fisheries (Project No.: 108096-03-1-HD110).                                                                                                   |
| Kim H.Y. et al. (2005)     | This work was supported by the fund of Erom Corporation                                                                                                                                                                                                               |
| Kim H.Y. et al. (2007)     | Not disclosed                                                                                                                                                                                                                                                         |

|                          |                                                                                                                                                                                                                                                                                                                                                                                                                                                                                                                                                                       |
|--------------------------|-----------------------------------------------------------------------------------------------------------------------------------------------------------------------------------------------------------------------------------------------------------------------------------------------------------------------------------------------------------------------------------------------------------------------------------------------------------------------------------------------------------------------------------------------------------------------|
| Kim J.M. et al.(2020)    | This study was supported by High Value-added Food Technology Development Program, Ministry of Agriculture, Food and Rural Affairs, Republic of Korea (312006-3) and by the Medical Research Center Program (No. 2011-0030074) through National Research Foundation (NRF) grant funded by the Korean government (MSIP).                                                                                                                                                                                                                                                |
| Kim S.P. et al. (2013)   | Not disclosed                                                                                                                                                                                                                                                                                                                                                                                                                                                                                                                                                         |
| Kim S.P. et al. (2014)   | Not disclosed                                                                                                                                                                                                                                                                                                                                                                                                                                                                                                                                                         |
| Kim S.P. et al. (2018)   | This work was supported by the Korean Institute of Planning and Evaluation for Technology in Food, Agricultural, Forestry and Fisheries (IPET) through Agri-Bio Industry Technology Development Program, funded by Ministry of Agriculture, Food and Rural Affairs (MAFRA) (no. 314019–3), and by the Korean Institute of Planning and Evaluation for Technology in Food, Agricultural, Forestry and Fisheries (IPET) through High Value-added Food Technology Development Program, funded by Ministry of Agriculture, Food and Rural Affairs (MAFRA) (no. 314076–3). |
| Lewis et al. (2020b)     | This work was supported by a gift from Daiwa Health Development. The study was also supported by Grant Number 1UL1TR000460, Miami Clinical and Translational Science Institute, from the National Center for Advancing Translational Sciences and the National Institute on Minority Health and Health Disparities.                                                                                                                                                                                                                                                   |
| Lewis et al. (2020a)     | This work was supported by a gift from Daiwa Health Development. The study was also supported by Grant Number 1UL1TR000460, Miami Clinical and Translational Science Institute, from the National Center for Advancing Translational Sciences and the National Institute on Minority Health and Health Disparities.                                                                                                                                                                                                                                                   |
| Lewis et al. (2020c)     | This work was supported by a gift from Daiwa Health Development. The study was also supported by (Grant no. 1UL1TR000460) Miami Clinical and Translational Science Institute from the National Center for Advancing Translational Sciences and the National Institute on Minority Health and Health Disparities.                                                                                                                                                                                                                                                      |
| Lissoni et al. (2008)    | Not disclosed                                                                                                                                                                                                                                                                                                                                                                                                                                                                                                                                                         |
| Markus et al. (2006)     | Not disclosed                                                                                                                                                                                                                                                                                                                                                                                                                                                                                                                                                         |
| Masood et al. (2013)     | Not disclosed                                                                                                                                                                                                                                                                                                                                                                                                                                                                                                                                                         |
| McDermott et al. (2006)  | The trial was funded by Daiwa Pharmaceutical Company. Dr George Lewith’s post is funded by a grant from the Rufford Maurice Laing Foundation.                                                                                                                                                                                                                                                                                                                                                                                                                         |
| Meshitsuka (2013)        | Not disclosed                                                                                                                                                                                                                                                                                                                                                                                                                                                                                                                                                         |
| Miura et al. (2004/2013) | Not disclosed                                                                                                                                                                                                                                                                                                                                                                                                                                                                                                                                                         |
| Noaman et al. (2008)     | We thank Daiwa Pharmaceuticals, Co. Ltd, Tokyo, Japan, for generously providing the MGN-3.                                                                                                                                                                                                                                                                                                                                                                                                                                                                            |
| Ohara et al. (2000)      | This work was supported in part by Grant-in-Aid for scientific research from Kobe Women's University                                                                                                                                                                                                                                                                                                                                                                                                                                                                  |
| Ohara et al. (2002)      | Not disclosed                                                                                                                                                                                                                                                                                                                                                                                                                                                                                                                                                         |
| Okamura (2004)           | Not disclosed                                                                                                                                                                                                                                                                                                                                                                                                                                                                                                                                                         |

|                              |                                                                                                                                                                                                                                                                                                                                                                                                                                                                                                                                     |
|------------------------------|-------------------------------------------------------------------------------------------------------------------------------------------------------------------------------------------------------------------------------------------------------------------------------------------------------------------------------------------------------------------------------------------------------------------------------------------------------------------------------------------------------------------------------------|
| Ooi et al. (2020)            | Daiwa Pharmaceutical Co., Ltd. (Daiwa) provided financial funding to commence the RBAC-QoL project with the affiliating university of the corresponding author as the trial sponsor. BioMedica Nutraceuticals Pty Ltd (BioMedica) provided additional funding to conduct the gut microbiome study of this research. The RBAC and placebo powder will be manufactured and supplied by Daiwa. SLO is a recipient of the Australian Government Research Training Program scholarship for this study.                                   |
| Pérez-Martínez et al. (2015) | We thank Daiwa Pharmaceutical Co. Ltd., Tokyo, Japan, for providing us MGN-3/BioBran. This work was supported in part by the National Health Service of Spain grant FIS PI12/01622, Fundación de la Sociedad Española de HematoOncología Infantil and CRIS Cancer Foundation ( <a href="http://www.criscancer.org/en/index.php">http://www.criscancer.org/en/index.php</a> ) to Antonio Perez-Martínez and from the German Jose Carreras Leukemia Foundation and the German Childhood Cancer Foundation (DKS) to Matthias Pfeiffer. |
| Pescatore et al. (2022)      | Not disclosed                                                                                                                                                                                                                                                                                                                                                                                                                                                                                                                       |
| Petrovics et al. (2016)      | The Authors would like to acknowledge Daiwa Pharmaceutical Co. Ltd., Tokyo, Japan, for the technical material support of this project. (free samples of BioBran MGN-3). The manufacturers of BioBran funded the trial, but placed no restrictions on the design of the trial or on the publication of results.                                                                                                                                                                                                                      |
| Salama et al. (2016)         | Funding for the study and BioBran were provided by Daiwa Pharmaceutical Co., Ltd., Tokyo, Japan. This study was supported in part by NIH-NIMHD grant no. U54 MD007598 and NIH-NCATS grant no. UL1 TR000124.                                                                                                                                                                                                                                                                                                                         |
| Sudo et al. (2001)           | Not disclosed                                                                                                                                                                                                                                                                                                                                                                                                                                                                                                                       |
| Takahara & Sano (2004)       | We would like thank Daiwa Pharmaceutical for supplying MGN-3 (BioBran) and Mitsubishi Chemical Laboratory (B.C.L.) for cooperation in blood test.                                                                                                                                                                                                                                                                                                                                                                                   |
| Tan & Flores (2020)          | Research funding and Lentin and placebo sachets were provided by Daiwa Pharmaceuticals Co Ltd. Tokyo, Japan.                                                                                                                                                                                                                                                                                                                                                                                                                        |
| Tazawa et al. (2000)         | Not disclosed                                                                                                                                                                                                                                                                                                                                                                                                                                                                                                                       |
| Tazawa et al. (2003)         | Not disclosed                                                                                                                                                                                                                                                                                                                                                                                                                                                                                                                       |
| Tsunekawa (2004)             | Not disclosed                                                                                                                                                                                                                                                                                                                                                                                                                                                                                                                       |
| Yamada et al. (2002)         | Not disclosed                                                                                                                                                                                                                                                                                                                                                                                                                                                                                                                       |
| Yu et al. (2004)             | This work was supported by the fund of Eromlife Corporation.                                                                                                                                                                                                                                                                                                                                                                                                                                                                        |
| Zhao et al. (2020)           | This work was supported by the Li Jie-shou Gut Barrier Foundation, China (Project nos. LJS-201708 and LJS-201811C), the Wuxi Science and Technology Bureau, China (Project no.201827), the Wuxi Health and Family Planning Commission Youth Research Foundation, China                                                                                                                                                                                                                                                              |
| Zheng et al. (2012a)         | Not disclosed                                                                                                                                                                                                                                                                                                                                                                                                                                                                                                                       |
| Zheng et al. (2012b)         | Not disclosed                                                                                                                                                                                                                                                                                                                                                                                                                                                                                                                       |
| Zhu et al. (2017)            | Not disclosed                                                                                                                                                                                                                                                                                                                                                                                                                                                                                                                       |

---

*Table S4.4. Characteristics of trial registration included for assessment.*

| <b>Trial Citation</b>                                         | <b>Registry</b>    | <b>Year</b> | <b>Registration ID</b> | <b>Condition</b>                                 | <b>Product</b> | <b>Status</b> | <b>Research Output</b>                        |
|---------------------------------------------------------------|--------------------|-------------|------------------------|--------------------------------------------------|----------------|---------------|-----------------------------------------------|
| ClinicalTrials.gov (2009)                                     | ClinicalTrials.gov | 2009        | NCT01018381            | Liver cancer                                     | Biobran MGN-3  | Completed     | Bang et al. (2010)                            |
| University Hospital Medical Information Network Center (2010) | UMIN-CTR (Japan)   | 2010        | UMIN000004350          | Hep B & C<br>Gastroenteritis for cervical cancer | Biobran MGN-3  | Completed     | Itoh et al. (2015)                            |
| Clinical Research Information Service (2012)                  | CRiS (S. Korea)    | 2012        | KCT0000536             | Healthy                                          | RBEP           | Completed     | Choi et al. (2014)                            |
| ClinicalTrials.gov (2013)                                     | ClinicalTrials.gov | 2013        | NCT02019628            | Healthy                                          | Biobran MGN-3  | Completed     | Ali et al. (2012)                             |
| ClinicalTrials.gov (2014)                                     | ClinicalTrials.gov | 2014        | NCT02214173            | HIV                                              | Biobran MGN-3  | Completed     | Lewis et al. (2020a);<br>Lewis et al. (2020b) |
| ClinicalTrials.gov (2015)                                     | ClinicalTrials.gov | 2015        | NCT02568787            | Non-alcoholic liver disease                      | Biobran MGN-3  | Completed     | Lewis et al. (2020c)                          |
| ClinicalTrials.gov (2016a)                                    | ClinicalTrials.gov | 2016        | NCT02690103            | Hepatitis C infection                            | Biobran MGN-3  | Completed     | Salama et al. (2016)                          |
| ClinicalTrials.gov (2016b)                                    | ClinicalTrials.gov | 2016        | NCT02922907            | HIV                                              | Biobran MGN-3  | Completed     | Cadden et al. (2020)                          |
| Current Controlled Trials (2017)                              | ISRCTN (UK)        | 2017        | ISRCTN31318565         | Lyme borreliosis                                 | Biobran MGN-3  | Ongoing       |                                               |
| Clinical Research Information Service (2018)                  | CRiS (S. Korea)    | 2018        | KCT0002646             | Healthy                                          | STR RB-F       | Discontinued  | Trial interrupted by COVID-19 – no results.   |
| University Hospital Medical Information Network Center (2018) | UMIN-CTR (Japan)   | 2018        | UMIN000034569          | B-cell non-Hodgkin's lymphoma                    | Biobran MGN-3  | Completed     | Results pending                               |
| Australian New Zealand Clinical Trials Registry (2019)        | ANZCTR             | 2019        | ACTRN12619000562178    | Solid organ cancer                               | Biobran MGN-3  | Ongoing       | Ooi et al. (2020)                             |
| ClinicalTrials.gov (2020)                                     | ClinicalTrials.gov | 2020        | NCT04646980            | Influenza-like illnesses                         | Biobran MGN-3  | Completed     | Elsaid et al. (2021)                          |

Table S4.5. Top 10 authors ranked by the total weighted coefficient (TWC) and article count.

| Ranking By |       | Author                  | Affiliation                                     | Country     | Count (% Total) | TWC   |
|------------|-------|-------------------------|-------------------------------------------------|-------------|-----------------|-------|
| TWC        | Count |                         |                                                 |             |                 |       |
| 1          | 1     | Ghoneum, Mamdooh        | Charles Drew University of Medicine and Science | USA         | 30 (30.61%)     | 30.00 |
| 2          | 2     | Badr El-Din, Nariman K. | University of Mansoura                          | Egypt       | 9 (9.18%)       | 7.64  |
| 3          | 4     | Gollapudi, Sastry       | University of California at Irvine              | USA         | 6 (6.12%)       | 6.00  |
| 3          | 4     | Hajtó, Tibor            | University of Pécs                              | Hungary     | 6 (6.12%)       | 6.00  |
| 5          | 3     | Maeda, Hiroaki          | Daiwa Pharmaceutical Co. Ltd.                   | Japan       | 7 (7.14%)       | 5.36  |
| 6          | 4     | Egashira, Yukari        | Chiba University                                | Japan       | 6 (6.12%)       | 4.50  |
| 7          | 10    | Lewis, John E.          | University of Miami Miller School of Medicine   | USA         | 4 (4.08%)       | 4.00  |
| 8          | 4     | Hong, Seong Gil         | Erom Co. Ltd.                                   | South Korea | 6 (6.12%)       | 3.75  |
| 9          | -     | Elsaid, Ahmed F.        | Zagazig University                              | Egypt       | 3 (3.06%)       | 3.00  |
| 9          | -     | Friedman, Mendel        | U.S. Department of Agriculture                  | USA         | 3 (3.06%)       | 3.00  |
| 9          | -     | Kim, Sung Phil          | Ajou University                                 | South Korea | 3 (3.06%)       | 3.00  |
| 9          | -     | Konefal, Janet          | University of Miami Miller School of Medicine   | USA         | 3 (3.06%)       | 3.00  |
| 9          | -     | Nam, Seok Hyun          | Ajou University                                 | South Korea | 3 (3.06%)       | 3.00  |
| -          | 8     | Hwang, Sung Joo         | Erom Co. Ltd.                                   | South Korea | 5 (5.10%)       | 1.51  |
| -          | 8     | Lee, Seong Ae           | STR Biotech Co. Ltd.                            | South Korea | 5 (5.10%)       | 1.66  |
| -          | 10    | Ali, Doaa A.            | University of Mansoura                          | Egypt       | 4 (4.08%)       | 2.14  |
| -          | 10    | Kim, Hwa Young          | Erom Co. Ltd.                                   | South Korea | 4 (4.08%)       | 2.46  |
| -          | 10    | Kim, Jin Min            | Erom Co. Ltd.                                   | South Korea | 4 (4.08%)       | 0.79  |
| -          | 10    | Park, Mi Hyoun          | Erom Co. Ltd.                                   | South Korea | 4 (4.08%)       | 2.31  |
| -          | 10    | Shaheen, Magda          | Charles Drew University of Medicine and Science | USA         | 4 (4.08%)       | 1.42  |
| -          | 10    | Woolger, Judi M.        | University of Miami Miller School of Medicine   | USA         | 4 (4.08%)       | 0.27  |

*Table S4.6. Cancer sites investigated by the included articles ordered by article count and breakdown by study design.*

| #  | Cancer Site | Count (%)  | Preclinical (%) | Observational (%) | Interventional (%) |
|----|-------------|------------|-----------------|-------------------|--------------------|
| 1  | Various     | 9 (20%)    | -               | 2 (22.22%)        | 7 (77.78%)         |
| 2  | Breast      | 8 (17.78%) | 4 (50%)         | 3 (37.5%)         | 1 (12.5%)          |
| 3  | Liver       | 5 (11.11%) | 2 (40%)         | -                 | 2 (50%)            |
| 4  | Blood *     | 4 (8.89%)  | 2 (50%)         | -                 | 2 (50%)            |
| 5  | Colorectal  | 2 (4.44%)  | -               | 2 (100%)          | -                  |
| 6  | Lung        | 2 (4.44%)  | -               | 2 (100%)          | -                  |
| 7  | Ovary       | 2 (4.44%)  | -               | 2 (100%)          | -                  |
| 8  | Stomach     | 2 (4.44%)  | 1 (50%)         | 1 (50%)           | -                  |
| 9  | Skin        | 2 (4.44%)  | 1 (50%)         | 1 (50%)           | -                  |
| 10 | Cervical    | 1 (2.22%)  | -               | -                 | 1 (100%)           |
| 11 | Head & Neck | 1 (2.22%)  | -               | -                 | 1 (100%)           |
| 12 | Bile Duct   | 1 (2.22%)  | -               | 1 (100%)          | -                  |
| 13 | Pancreatic  | 1 (2.22%)  | -               | 1 (100%)          | -                  |
| 14 | Umbilical   | 1 (2.22%)  | -               | 1 (100%)          | -                  |
| 15 | Uterus      | 1 (2.22%)  | -               | 1 (100%)          | -                  |
| 16 | Prostate    | 1 (2.22%)  | 1 (100%)        | -                 | -                  |

**Note:** \* cancer of the blood includes multiple myeloma, leukemia, and early B-cell lymphoid malignancies.

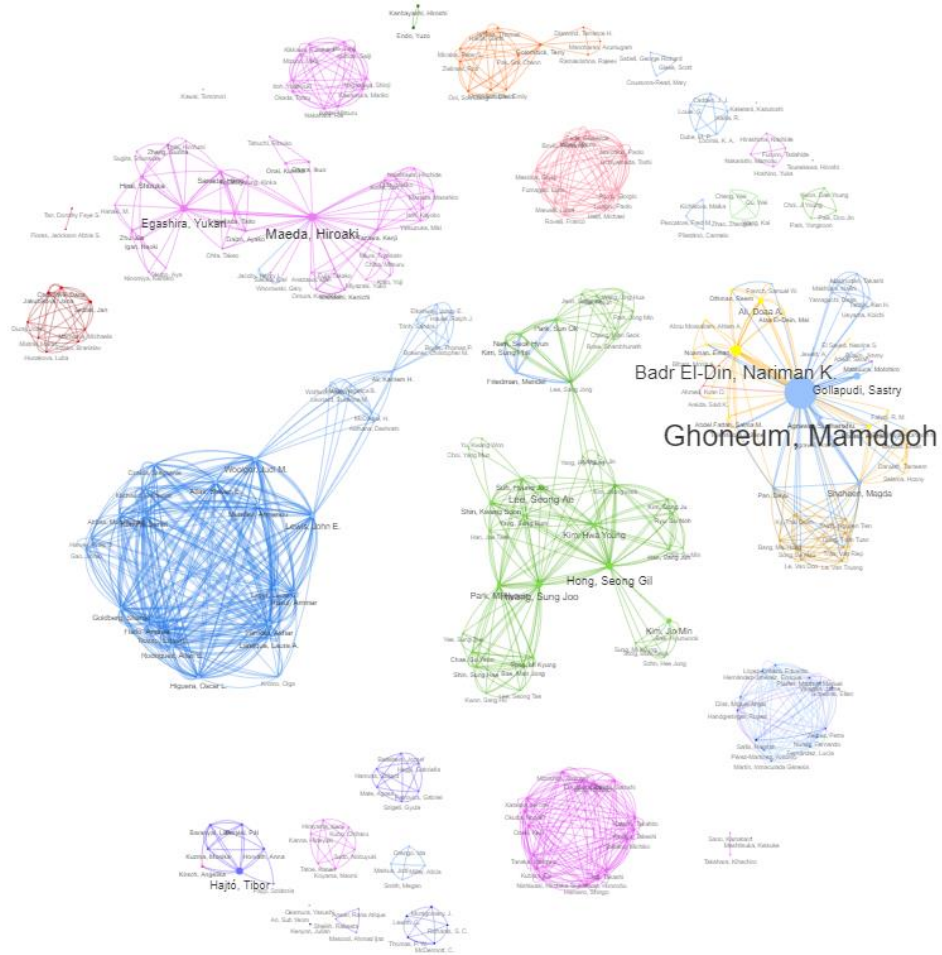

Fig. S4.1. The collaborative network of authors in RBAC research. The interactive version is available online at <http://resource.rbac-qol.info>.



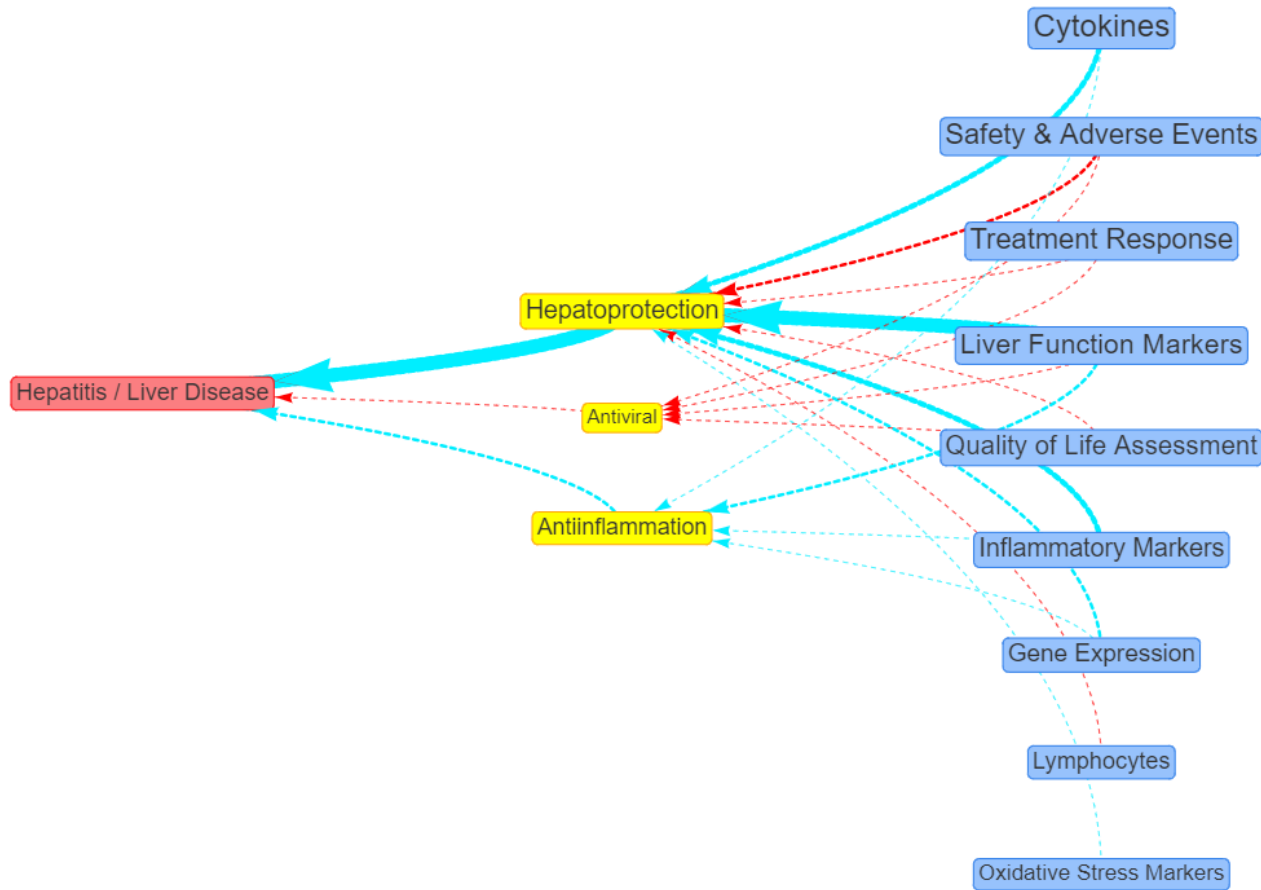

Fig. S4.2. Network visualisation of the beneficial actions (yellow nodes) of RBAC in hepatitis and liver diseases (red node) and its associated positive outcomes (blue). The links between nodes represent the availability of sources of evidence, with the colours indicating the study types (red = interventional, green = observational, and blue = preclinical). The node size and link thickness reflect the number of sources. The original interactive network diagram is available at <https://resource.rbac-qol.info>
