# Supplementary material for: Modified rice bran arabinoxylan as a nutraceutical in health and disease—A scoping review with bibliometric analysis
Source: PubMed Central journal article supplement (PMC10470915; doi:10.1371/journal.pone.0290314), 2023-08-31
Supplement: pone.0290314.s005.pdf [file pone.0290314.s005.pdf]

## S5. Additional References

Full citation of all included articles and trial registrations in APA 7<sup>th</sup> format

Ali, K. H., Melillo, A. B., Leonard, S. M., Asthana, D., Woolger, J. M., Wolfson, A. H., McDaniel, H., & Lewis, J. E. (2012). An open-label, randomized clinical trial to assess the immunomodulatory activity of a novel oligosaccharide compound in healthy adults. *Functional Foods in Health and Disease*, 2(7), 265.

An, S. Y. (2011). *Immune-enhance and anti-tumor effect of exo-biopolymer extract from submerged culture of *Lentinus edodes* with rice bran* [Doctoral Thesis, Korea University]. Seoul, Republic of Korea.

Australian New Zealand Clinical Trials Registry. (2019). *Rice bran arabinoxylan compound and quality of life of cancer patients (RBAC-QoL)*. Australian New Zealand Clinical Trials Registry. Retrieved 2022-12-01 from <https://www.anzctr.org.au/Trial/Registration/TrialReview.aspx?id=377340&isReview=true>

Badr El-Din, N. K., Abdel Fattah, S. M., Pan, D., Tolentino, L., & Ghoneum, M. (2016a). Chemopreventive activity of MGN-3/Biobran against chemical induction of glandular stomach carcinogenesis in rats and its apoptotic effect in gastric cancer cells. *Integrative Cancer Therapies*, 15(4), NP26-NP34. <https://doi.org/10.1177/1534735416642287>

Badr El-Din, N. K., Ali, D. A., Alaa El-Dein, M., & Ghoneum, M. (2016b). Enhancing the apoptotic effect of a low dose of paclitaxel on tumor cells in mice by arabinoxylan rice bran (MGN-3/Biobran). *Nutrition and Cancer*, 68(6), 1010-1020. <https://doi.org/10.1080/01635581.2016.1192204>

Badr El-Din, N. K., Ali, D. A., & Othman, R. M. (2016c). Inhibition of experimental carcinogenesis by the bioactive natural product Biobran. *Journal of Plant Protection and Pathology*, 7(1), 85-91. <https://doi.org/10.21608/jppp.2016.50064>

Badr El-Din, N. K., Ali, D. A., Othman, R. M., French, S. W., & Ghoneum, M. (2020). Chemopreventive role of arabinoxylan rice bran, MGN-3/Biobran, on liver carcinogenesis in rats. *Biomedicine & Pharmacotherapy*, 126, 110064. <https://doi.org/10.1016/j.biopha.2020.110064>

Badr El-Din, N. K., Areida, S. K., Ahmed, K. O., & Ghoneum, M. (2019). Arabinoxylan rice bran (MGN-3/Biobran) enhances radiotherapy in animals bearing Ehrlich ascites carcinoma. *Journal of Radiation Research*, 60(6), 747-758. <https://doi.org/10.1093/jrr/rrz055>

Badr El-Din, N. K., Noaman, E., & Ghoneum, M. (2008). In vivo tumor inhibitory effects of nutritional rice bran supplement MGN-3/Biobran on Ehrlich carcinoma-bearing mice. *Nutrition and Cancer*, 60(2), 235-244. <https://doi.org/10.1080/01635580701627285>

*Modified Rice Bran Arabinoxylan as a Nutraceutical in Health and Disease – A Scoping Review with Bibliometric Analysis*

---

- Bae, M. J., Lee, S. T., Chae, S. Y., Shin, S. H., Kwon, S. H., Park, M. H., Song, M. Y., & Hwang, S. J. (2004). The effects of the arabinoxylane and the polysaccharide peptide (PSP) on the antiallergy, anticancer. *Journal of the Korean Society of Food Science and Nutrition*, 33(3), 469-474. <https://doi.org/10.3746/jkfn.2004.33.3.469>
- Bang, M. H., Tran, V. R., Thinh, N. T., Song, L. H., Dung, T. T., Le, V. T., Le, V. D., Ky, T. D., Pan, D., Shaheen, M., & Ghoneum, M. (2010). Arabinoxylan rice bran (MGN-3) enhances the effects of interventional therapies for the treatment of hepatocellular carcinoma: a three-year randomized clinical trial. *Anticancer Research*, 30(12), 5145-5151.
- Brush, T. P., Trinh, S., Brawner, C. M., Ali, K. H., Hauke, R. J., & Elkahwaji, J. E. (2010). RBAC, a modified form of Arabinoxylan from rice bran, impairs prostate cancer cell line proliferation, adhesion, and invasion in vitro [Abstract]. *Cancer Research*, 70(8), 5662-5662. <https://doi.org/10.1158/1538-7445.AM10-5662>
- Cadden, J. J., Loomis, K. A., Kallia, R., Louie, S., & Dube, M. P. (2020). Anti-inflammatory effects of arabinoxylan rice bran supplementation in participants with treated, suppressed HIV infection and inadequate immune reconstitution: a randomized, doubleblind trial [Abstract]. *Antiviral Therapy*, 25(Suppl 1), A26.
- Chae, S. Y., Shin, S. H., Bae, M. J., Park, M. H., Song, M. K., Hwang, S. J., & Yee, S. T. (2004). Effect of arabinoxylane and PSP on activation of immune cells. *Journal of the Korean Society of Food Science and Nutrition*, 33(2), 278-286. <https://doi.org/10.3746/jkfn.2004.33.2.278>
- Choi, J. Y., Paik, D. J., Kwon, D. Y., & Park, Y. (2014). Dietary supplementation with rice bran fermented with *Lentinus edodes* increases interferon- $\gamma$  activity without causing adverse effects: a randomized, double-blind, placebo-controlled, parallel-group study. *Nutrition Journal*, 13, 35. <https://doi.org/10.1186/1475-2891-13-35>
- Cholujova, D., Jakubikova, J., Czako, B., Martisova, M., Hunakova, L., Duraj, J., Mistrik, M., & Sedlak, J. (2013). MGN-3 arabinoxylan rice bran modulates innate immunity in multiple myeloma patients. *Cancer Immunology, Immunotherapy*, 62(3), 437-445. <https://doi.org/10.1007/s00262-012-1344-z>
- Cholujova, D., Jakubikova, J., & Sedlak, J. (2009). BioBran-augmented maturation of human monocyte-derived dendritic cells. *Neoplasma*, 56(2), 89-95. [https://doi.org/10.4149/neo\\_2009\\_02\\_89](https://doi.org/10.4149/neo_2009_02_89)
- Chung, W. S., Wang, J. H., Bose, S., Park, J. M., Park, S. O., Lee, S. J., Jeon, S., & Kim, H. (2015). Hepatoprotective effect of *Lentinus edodes* mycelia fermented formulation against alcoholic liver injury in rats. *Journal of Food Biochemistry*, 39(3), 251-262. <https://doi.org/10.1111/jfbc.12124>
- Clinical Research Information Service. (2012). *Effects of ingestion of fermented rice bran powder on immune function in healthy adults*. Clinical Research Information Service (CRIS) of Republic of Korea <https://cris.nih.go.kr/cris/search/listDetail.do?searchWord=KCT0000536>

- Clinical Research Information Service. (2018). *A 8 week, randomized, double-blind, Placebo-controlled clinical trial of RB-F for the evaluation of efficacy and safety on immune function*. Clinical Research Information Service (CRiS) of Republic of Korea  
<https://cris.nih.go.kr/cris/search/listDetail.do?searchWord=KCT0002646>
- ClinicalTrials.gov. (2009). *Arabinoxylan rice bran (MGN-3/Biobran) for the treatment of hepatocellular carcinoma and hepatitis B and C infection*. National Library of Medicine (US).  
<https://clinicaltrials.gov/show/NCT01018381>
- ClinicalTrials.gov. (2013). *Enhanced natural killer cell activity and RBAC*. National Library of Medicine (US). <https://clinicaltrials.gov/show/NCT02019628>
- ClinicalTrials.gov. (2014). *The effect of an enhanced rice bran nutritional supplement in HIV(BRM4)*. National Library of Medicine (US). <https://clinicaltrials.gov/ct2/show/NCT02214173>
- ClinicalTrials.gov. (2015). *The effect of an RBAC supplement (BRM4) on NAFLD*. National Library of Medicine (US). <https://clinicaltrials.gov/show/NCT02568787>
- ClinicalTrials.gov. (2016a). *Response modifier (arabinoxylan rice bran/mgn-3/biobran) with interferon-alpha for for HCV*. National Library of Medicine (US).  
<https://clinicaltrials.gov/show/NCT02690103>
- ClinicalTrials.gov. (2016b). *Rice bran supplementation in treated HIV infection*. National Library of Medicine (US). <https://clinicaltrials.gov/show/NCT02922907>
- ClinicalTrials.gov. (2020). *Biobran/MGN-3 increases innate resistance and reduces the incidence of influenza-like illnesses*. National Library of Medicine (US).  
<https://clinicaltrials.gov/show/NCT04646980>
- Current Controlled Trials. (2017). *Trial of the functional food Biobran in patients with persistent symptoms attributed to Lyme borreliosis*. BioMed Central.  
<https://www.isrctn.com/ISRCTN31318565>
- Daizo, A., Yamada, T., Egashira, Y., Maeda, H., Ohta, T., & Sanada, H. (2001). Effect of enzymatically treated rice bran hemicellulose (MGN-3) on experimental galactosamine liver injury in rats [Abstract]. *Journal of Japanese Association for Dietary Fiber Research*, 5(2), 48-48.  
[https://doi.org/10.11217/jjdf1997.5.2\\_43](https://doi.org/10.11217/jjdf1997.5.2_43)
- Egashira, Y., Hanaki, M., Hirai, S., Zhu, X., & Igari, N. (2013). Suppressive effect of hydrolyzed rice bran (HRB) on D-galactosamine/ LPS induced IL-18 and hepatitis by inhibition of NF-kappa B pathway in mice [Abstract]. *Annals of Nutrition and Metabolism*, 63(Suppl 1), 1700-1701.  
<https://doi.org/10.1159/000354245>

*Modified Rice Bran Arabinoxylan as a Nutraceutical in Health and Disease – A Scoping Review with Bibliometric Analysis*

---

- Elsaid, A. F., Agrawal, S., Agrawal, A., & Ghoneum, M. (2021). Dietary supplementation with Biobran/MGN-3 increases innate resistance and reduces the incidence of influenza-like illnesses in elderly subjects: a randomized, double-blind, placebo-controlled pilot clinical trial. *Nutrients*, 13(11). <https://doi.org/10.3390/nu13114133>
- Elsaid, A. F., Fahmi, R. M., Shaheen, M., & Ghoneum, M. (2020). The enhancing effects of Biobran/MGN-3, an arabinoxylan rice bran, on healthy old adults' health-related quality of life: a randomized, double-blind, placebo-controlled clinical trial. *Quality of Life Research*, 29(2), 357-367. <https://doi.org/10.1007/s11136-019-02286-7>
- Elsaid, A. F., Shaheen, M., & Ghoneum, M. (2018). Biobran/MGN-3, an arabinoxylan rice bran, enhances NK cell activity in geriatric subjects: A randomized, double-blind, placebo-controlled clinical trial. *Experimental and Therapeutic Medicine*, 15(3), 2313-2320. <https://doi.org/10.3892/etm.2018.5713>
- Endo, Y., & Kanbayashi, H. (2003). Modified rice bran beneficial for weight loss of mice as a major and acute adverse effect of cisplatin. *Pharmacology and Toxicology*, 92(6), 300-303. <https://doi.org/10.1034/j.1600-0773.2003.920608.x>
- Ghoneum, M. (1998a). Anti-HIV activity in vitro of MGN-3, an activated arabinoxylane from rice bran. *Biochemical and Biophysical Research Communications*, 243(1), 25-29.
- Ghoneum, M. (1998b). Enhancement of human natural killer cell activity by modified arabinoxylane from rice bran (MGN-3). *International Journal of Immunotherapy*, 14(2), 89-99.
- Ghoneum, M. (1999, Dec 11-13). *Immunostimulation and cancer prevention* [Abstract]. 7th International Congress on Anti-Aging & Biomedical Technologies, Las Vegas, NV, USA.
- Ghoneum, M., & Abedi, S. (2004). Enhancement of natural killer cell activity of aged mice by modified arabinoxylan rice bran (MGN-3/Biobran). *Journal of Pharmacy and Pharmacology*, 56(12), 1581-1588. <https://doi.org/10.1211/0022357044922>
- Ghoneum, M., & Agrawal, S. (2011). Activation of human monocyte-derived dendritic cells in vitro by the biological response modifier arabinoxylan rice bran (MGN-3/Biobran). *International Journal of Immunopathology and Pharmacology*, 24(4), 941-948. <https://doi.org/10.1177/039463201102400412>
- Ghoneum, M., & Agrawal, S. (2014). MGN-3/biobran enhances generation of cytotoxic CD8+ T cells via upregulation of DEC-205 expression on dendritic cells. *International Journal of Immunopathology and Pharmacology*, 27(4), 523-530. <https://doi.org/10.1177/039463201402700408>
- Ghoneum, M., Badr El-Din, N. K., Abdel Fattah, S. M., & Tolentino, L. (2013). Arabinoxylan rice bran (MGN-3/Biobran) provides protection against whole-body gamma -irradiation in mice via

restoration of hematopoietic tissues. *Journal of Radiation Research*, 54(3), 419-429.  
<https://doi.org/10.1093/jrr/rrs119>

Ghoneum, M., Badr El-Din, N. K., Ali, D. A., & Alaa El-Dein, M. (2014). Modified arabinoxylan from rice bran, MGN-3/Biobran, sensitizes metastatic breast cancer cells to paclitaxel in vitro. *Anticancer Research*, 34(1A), 81-87.

Ghoneum, M., & Brown, J. (1999). NK Immunorestitution and cancer patients by MGN-3, a modified arabinoxylan rice bran (Study of 32 patients followed for up to 4 years). In R. M. Klatz & R. Goldman (Eds.), *Anti-aging Medical Therapeutics* (Vol. III, pp. 217-226). Health Quest Publications.

Ghoneum, M., & El Sayed, N. S. (2021). Protective effect of Biobran/MGN-3 against sporadic Alzheimer's disease mouse model: possible role of oxidative stress and apoptotic pathways. *Oxidative Medicine and Cellular Longevity*, 2021. <https://doi.org/10.1155/2021/8845064>

Ghoneum, M., & Gollapudi, S. (2003). Modified arabinoxylan rice bran (MGN-3/Biobran) sensitizes human T cell leukemia cells to death receptor (CD95)-induced apoptosis. *Cancer Letters*, 201(1), 41-49. [https://doi.org/10.1016/s0304-3835\(03\)00458-0](https://doi.org/10.1016/s0304-3835(03)00458-0)

Ghoneum, M., & Gollapudi, S. (2005a). Modified arabinoxylan rice bran (MGN-3/Biobran) enhances yeast-induced apoptosis in human breast cancer cells in vitro. *Anticancer Research*, 25(2a), 859-870.

Ghoneum, M., & Gollapudi, S. (2005b). Synergistic role of arabinoxylan rice bran (MGN-3/Biobran) in *S. cerevisiae*-induced apoptosis of monolayer breast cancer MCF-7 cells. *Anticancer Research: International Journal of Cancer Research and Treatment*, 25(6b), 4187-4196.

Ghoneum, M., & Gollapudi, S. (2011). Synergistic apoptotic effect of arabinoxylan rice bran (MGN-3/Biobran) and curcumin (turmeric) on human multiple myeloma cell line U266 in vitro. *Neoplasia*, 58(2), 118-123. [https://doi.org/10.4149/neo\\_2011\\_02\\_118](https://doi.org/10.4149/neo_2011_02_118)

Ghoneum, M., & Jewett, A. (2000). Production of tumor necrosis factor-alpha and interferon-gamma from human peripheral blood lymphocytes by MGN-3, a modified arabinoxylan from rice bran, and its synergy with interleukin-2 in vitro. *Cancer Detection and Prevention*, 24(4), 314-324.

Ghoneum, M., & Matsuura, M. (2004). Augmentation of macrophage phagocytosis by modified arabinoxylan rice bran (MGN-3/biobran). *International Journal of Immunopathology and Pharmacology*, 17(3), 283-292. <https://doi.org/10.1177/039463200401700308>

Ghoneum, M., Matsuura, M., & Gollapudi, S. (2008). Modified arabinoxylan rice bran (MGN-3/Biobran) enhances intracellular killing of microbes by human phagocytic cells in vitro. *International Journal of Immunopathology and Pharmacology*, 21(1), 87-95.  
<https://doi.org/10.1177/039463200802100110>

- Ghoneum, M., Tachiki, K. H., Ueyama, K., Makinodan, T., Makhijani, N., & Yamaguchi, D. (2000, Dec 14-17). *Natural biological response modifier (MGN-3) shown to be effective against tumor cell growth* [Abstract]. 8th International Congress on Anti-Aging & Biomedical Technologies, Las Vegas, NV, USA.
- Giese, S., Sabell, G. R., & Coussons-Read, M. (2008). Impact of ingestion of rice bran and shitake mushroom extract on lymphocyte function and cytokine production in healthy rats. *Journal of Dietary Supplements*, 5(1), 47-61. <https://doi.org/10.1080/19390210802329196>
- Gollapudi, S., & Ghoneum, M. (2008). MGN-3/Biobran, modified arabinoxylan from rice bran, sensitizes human breast cancer cells to chemotherapeutic agent, daunorubicin. *Cancer Detection and Prevention*, 32(1), 1-6. <https://doi.org/10.1016/j.cdp.2008.02.006>
- Golombick, T., Diamond, T. H., Manoharan, A., & Ramakrishna, R. (2016). Addition of rice bran arabinoxylan to curcumin therapy may be of benefit to patients with early-stage B-cell lymphoid malignancies (monoclonal gammopathy of undetermined significance, smoldering multiple myeloma, or stage 0/1 chronic lymphocytic leukemia). *Integrative Cancer Therapies*, 15(2), 183-189. <https://doi.org/10.1177/1534735416635742>
- Hajtó, T. (2017). Can a standardized plant immunomodulator (rice bran arabinoxylan concentrate/MGN-3) increase the effects of MEK and BRAF inhibitors with clinical benefit? Case report of a patient with carcinoma in biliary duct. *Research and Review Insights*, 1(3), 1-4. <https://doi.org/10.15761/rri.1000115>
- Hajtó, T. (2018). New perspectives to improve the MHC-I unrestricted immune mechanisms against malignant tumors. *Advances in Clinical and Translational Research*, 2(3), 100014.
- Hajtó, T., Baranyai, L., Kirsch, A., Kuzma, M., & Perjési, P. (2015). Can a synergistic activation of pattern recognition receptors by plant immunomodulators enhance the effect of oncologic therapy? Case Report of a patient with uterus and ovary sarcoma. *Clinical Case Reports and Reviews*, 1(10), 235-238. <https://doi.org/10.15761/CCRR.1000176>
- Hajtó, T., Horváth, A., Baranyai, L., Kuzma, M., & Perjési, P. (2016a). Can the EGFR inhibitors increase the immunomodulatory effects of standardized plant extracts (mistletoe lectin and arabonoxylan) with clinical benefit? Case report of a patient with lung adenocarcinoma. *Clinical Case Reports and Reviews*, 2(6), 456-459. <https://doi.org/10.15761/CCRR.1000244>
- Hajtó, T., Horváth, A., & Papp, S. (2016b). Improvement of quality of life in tumor patients after an immunomodulatory treatment with standardized mistletoe lectin and arabinoxylan plant extracts. *International Journal of Neurorehabilitation*, 3(2), 2-4. <https://doi.org/10.4172/2376-0281.1000205>

- Hajtó, T., & Kirsch, A. (2013). Case reports of cancer patients with hepatic metastases treated by standardized plant immunomodulatory preparations. *Journal of Cancer Research Updates*, 2(1), 1-9. <https://doi.org/10.6000/1929-2279.2013.02.01.1>
- Hoshino, Y., Hirashima, N., Nakanishi, M., & Furuno, T. (2010). Inhibition of degranulation and cytokine production in bone marrow-derived mast cells by hydrolyzed rice bran. *Inflammation Research*, 59(8), 615-625. <https://doi.org/10.1007/s00011-010-0173-9>
- Ichihashi, K. (2004). Experience with administration of BioBran in patients with chronic rheumatism. *Clinical Pharmacology and Therapy*, 14(4), 459-463.
- Itoh, Y., Mizuno, M., Ikeda, M., Nakahara, R., Kubota, S., Ito, J., Okada, T., Kawamura, M., Kikkawa, F., & Naganawa, S. (2015). A randomized, double-blind pilot trial of hydrolyzed rice bran versus placebo for radioprotective effect on acute gastroenteritis secondary to chemoradiotherapy in patients with cervical cancer. *Evidence-based Complementary and Alternative Medicine*, 974390-974390. <https://doi.org/10.1155/2015/974390>
- Jacoby, H. I., Wnorowski, G., Sakata, K., & Maeda, H. (2001). The effect of MGN-3 on cisplatin and doxorubicin induced toxicity in the rat. *Journal of Nutraceuticals, Functional & Medical Foods*, 3(4), 3-11. [https://doi.org/10.1300/J133v03n04\\_02](https://doi.org/10.1300/J133v03n04_02)
- Kaketani, K. (2004). A case where an immunomodulatory food was effective in conservative therapy for progressive terminal pancreatic cancer. *Clinical Pharmacology and Therapy*, 14(3), 273-279.
- Kambayashi, H., & Endo, Y. (2002). Evaluation of the effects of asthma prevention and symptom reduction by enzymatically modified rice-bran foods in asthmatic model mice [Abstract]. *Japanese Journal of Allergology*, 51(9/10), 957-957. [https://doi.org/10.15036/arerugi.51.957\\_3](https://doi.org/10.15036/arerugi.51.957_3)
- Kamiya, T., Shikano, M., Tanaka, M., Ozeki, K., Ebi, M., Katano, T., Hamano, S., Nishiwaki, H., Tsukamoto, H., Mizoshita, T., Mori, Y., Kubota, E., Tanida, S., Kataoka, H., Okuda, N., & Joh, T. (2014). Therapeutic effects of Biobran, modified arabinoxylan rice bran, in improving symptoms of diarrhea predominant or mixed type irritable bowel syndrome: a pilot, randomized controlled study. *Evidence-Based Complementary and Alternative Medicine*, 2014. <https://doi.org/10.1155/2014/828137>
- Kang, S. J., Yang, H. Y., Lee, S. J., Kim, J. H., Hwang, S. J., & Hong, S. G. (2022). Immunostimulatory effect of rice bran fermented by *Lentinus edodes* mycelia on mouse macrophages and splenocytes. *Journal of the Korean Society of Food Science and Nutrition*, 51(8), 743-750. <https://doi.org/10.3746/jkfn.2022.51.8.743>
- Kawai, T. (2004). One case of a patient with umbilical metastasis of recurrent cancer (Sister Mary Joseph's Nodule, SMJN) who has survived for a long time under immunomodulatory supplement therapy. *Clinical Pharmacology and Therapy*, 14(3), 281-288.

- Kenyon, J. (2001, Nov). A descriptive questionnaire-based study on the use of Biobran (MGN3), in chronic fatigue syndrome. *Townsend Letter for Doctors and Patients*, (220), 48-50.
- Kim, D. J., Choi, S. M., Kim, H. Y., Kim, J. H., Ryu, S. N., Han, S. J., & Hong, S. G. (2011a). Evaluation of biological activities of fermented rice bran from novel black colored rice cultivar SuperC3GHi. *Korean Journal of Crop Science*, 56(4), 420-426.
- Kim, D. J., Ryu, S.-N., Han, S. J., Kim, H. Y., Kim, J. H., & Hong, S. G. (2011b). In vivo immunological activity in fermentation with black rice bran. *The Korean Journal of Food And Nutrition*, 24(3), 273-281. <https://doi.org/10.9799/KSFAN.2011.24.3.273>
- Kim, H. Y., Han, J. T., Hong, S. G., Yang, S. B., Hwang, S. J., Shin, K. S., Suh, H. J., & Park, M. H. (2005). Enhancement of immunological activity in exo-biopolymer from submerged culture of *Lentinus edodes* with rice bran. *Natural Product Sciences*, 11(3), 183-187.
- Kim, H. Y., Kim, J. H., Yang, S. B., Hong, S. G., Lee, S. A., Hwang, S. J., Shin, K. S., Suh, H. J., & Park, M. H. (2007). A polysaccharide extracted from rice bran fermented with *Lentinus edodes* enhances natural killer cell activity and exhibits anticancer effects. *Journal of Medicinal Food*, 10(1), 25-31. <https://doi.org/10.1089/jmf.2006.116>
- Kim, J. M., Hong, S. G., Song, B. S., Sohn, H. J., Baik, H., & Sung, M. K. (2020). Efficacy of cereal-based oral nutrition supplement on nutritional status, inflammatory cytokine secretion and quality of life in cancer patients under cancer therapy. *Journal of Cancer Prevention*, 25(1), 55-63. <https://doi.org/10.15430/JCP.2020.25.1.55>
- Kim, S. P., Lee, S. J., Nam, S. H., & Friedman, M. (2018). The composition of a bioprocessed shiitake (*Lentinus edodes*) mushroom mycelia and rice bran formulation and its antimicrobial effects against *Salmonella enterica* subsp. *enterica* serovar Typhimurium strain SL1344 in macrophage cells and in mice. *BMC Complementary and Alternative Medicine*, 18(1). <https://doi.org/10.1186/s12906-018-2365-8>
- Kim, S. P., Park, S. O., Lee, S. J., Nam, S. H., & Friedman, M. (2013). A polysaccharide isolated from the liquid culture of *Lentinus edodes* (Shiitake) mushroom mycelia containing black rice bran protects mice against a *Salmonella* lipopolysaccharide-induced endotoxemia. *Journal of Agricultural and Food Chemistry*, 61(46), 10987-10994. <https://doi.org/10.1021/jf403173k>
- Kim, S. P., Park, S. O., Lee, S. J., Nam, S. H., & Friedman, M. (2014). A polysaccharide isolated from the liquid culture of *Lentinus edodes* (Shiitake) mushroom mycelia containing black rice bran protects mice against salmonellosis through upregulation of the Th1 immune reaction. *Journal of Agricultural and Food Chemistry*, 62(11), 2384-2391. <https://doi.org/10.1021/jf405223q>
- Lewis, J. E., Atlas, S. E., Abbas, M. H., Rasul, A., Farooqi, A., Lantigua, L. A., Michaud, F., Goldberg, S., Lages, L. C., Gao, J., Higuera, O. L., Fiallo, A., Harvey, P. D., Tiozzo, E., Woolger, J. M., Ciraula, S., Mendez, A., Rodriguez, A. E., & Konefal, J. (2020a). Cardiovascular, endothelial function,



and immune markers in response to treatment with a polysaccharide in HIV(+) adults in a randomized, double-blind placebo-controlled trial. *Journal of Clinical and Translational Research*, 5(3), 140-147.

Lewis, J. E., Atlas, S. E., Abbas, M. H., Rasul, A., Farooqi, A., Lantigua, L. A., Michaud, F., Goldberg, S., Lages, L. C., Higuera, O. L., Fiallo, A., Tiozzo, E., Woolger, J. M., Ciraula, S., Mendez, A., Rodriguez, A. E., & Konefal, J. (2020b). The novel effects of a hydrolyzed polysaccharide dietary supplement on immune, hepatic, and renal function in adults with HIV in a randomized, double-blind, placebo-control trial. *Journal of Dietary Supplements*, 17(4), 429-441. <https://doi.org/10.1080/19390211.2019.1619010>

Lewis, J. E., Atlas, S. E., Higuera, O. L., Fiallo, A., Rasul, A., Farooqi, A., Kromo, O., Lantigua, L. A., Tiozzo, E., Woolger, J. M., Goldberg, S., Mendez, A., Rodriguez, A. E., & Konefal, J. (2020c). Corrigendum to “The Effect of a Hydrolyzed Polysaccharide Dietary Supplement on Biomarkers in Adults with Nonalcoholic Fatty Liver Disease”. *Evidence-Based Complementary and Alternative Medicine*, 2020, 10. <https://doi.org/10.1155/2020/9575878>

Lissoni, P., Messina, G., Brivio, F., Fumagalli, L., Rovelli, F., Maruelli, L., Miceli, M., Marchiori, P., Porro, G., Held, M., Fede, G., & Uchiyamada, T. (2008). Modulation of the anticancer immunity by natural agents: inhibition of T regulatory lymphocyte generation by arabinoxylan in patients with locally limited or metastatic solid tumors. *Cancer Therapy*, 6(2), 1011-1016.

Markus, J., Miller, A., Smith, M., & Orengo, I. (2006). Metastatic hemangiopericytoma of the skin treated with wide local excision and MGN-3. *Dermatologic Surgery*, 32(1), 145-147. <https://doi.org/10.1111/1524-4725.2006.32023>

Masood, A. I., Sheikh, R., & Anwer, R. A. (2013). “BIOBRAN MGN-3”; Effect of reducing side effects of chemotherapy in breast cancer patients. *The Professional Medical Journal*, 20(1), 13-16.

McDermott, C., Richards, S. C., Thomas, P. W., Montgomery, J., & Lewith, G. (2006). A placebo-controlled, double-blind, randomized controlled trial of a natural killer cell stimulant (BioBran MGN-3) in chronic fatigue syndrome. *QJM: An International Journal of Medicine*, 99(7), 461-468. <https://doi.org/10.1093/qjmed/hcl063>

Meshitsuka, K. (2013). A case of stage IV hepatocellular carcinoma treated by KM900, Biobran, and psychotherapy has presented significant good results. *Personalized Medicine Universe (Japanese Edition)*, 1(1), 46-48.

Miura, T., Chiba, M., Miyazaki, Y., Kato, Y., & Maeda, H. (2004/2013). Chemical structure of the component involved in immunoregulation. In *BioBran/MGN-3 (Rice Bran Arabinoxylan Coumpound): Basic and clinical application to integrative medicine* (2nd ed., pp. 14-22). BioBran Research Foundation. (Reprinted from a report of 2004 Annual Meeting of the Japanese society of Applied Glycoscience.)

*Modified Rice Bran Arabinoxylan as a Nutraceutical in Health and Disease – A Scoping Review with Bibliometric Analysis*

---

- Noaman, E., Badr El-Din, N. K., Bibars, M. A., Abou Mossallam, A. A., & Ghoneum, M. (2008). Antioxidant potential by arabinoxylan rice bran, MGN-3/biobran, represents a mechanism for its oncostatic effect against murine solid Ehrlich carcinoma. *Cancer Letters*, *268*(2), 348-359. <https://doi.org/10.1016/j.canlet.2008.04.012>
- Ohara, I., Onai, K., & Maeda, H. (2002). Modified rice bran improves glucose tolerance in NIDDM adult rats given streptozotocin as neonates. *Aichi Gakusen University Research Studies*, *37*, 17-23.
- Ohara, I., Tabuchi, R., & Onai, K. (2000). Effects of modified rice bran on serum lipids and taste preference in streptozotocin-induced diabetic rats. *Nutrition research*, *20*(1), 59-68. [https://doi.org/10.1016/S0271-5317\(99\)00138-4](https://doi.org/10.1016/S0271-5317(99)00138-4)
- Okamura, Y. (2004). The clinical significance of Biobran in the immunotherapy for cancer. *Clinical Pharmacology and Therapy*, *14*(3), 289-294.
- Ooi, S. L., Pak, S. C., Micalos, P. S., Schupfer, E., Zielinski, R., Jeffries, T., Harris, G., Golombick, T., & McKinnon, D. (2020). Rice bran arabinoxylan compound and quality of life of cancer patients (RBAC-QoL): Study protocol for a randomized pilot feasibility trial. *Contemporary Clinical Trials Communications*, *19*, 100580. <https://doi.org/10.1016/j.conctc.2020.100580>
- Pérez-Martínez, A., Valentín, J., Fernández, L., Hernández-Jiménez, E., López-Collazo, E., Zerbes, P., Schwörer, E., Nuñez, F., Martín, I. G., Sallis, H., Díaz, M. Á., Handgretinger, R., & Pfeiffer, M. M. (2015). Arabinoxylan rice bran (MGN-3/Biobran) enhances natural killer cell-mediated cytotoxicity against neuroblastoma in vitro and in vivo. *Cytotherapy*, *17*(5), 601-612. <https://doi.org/10.1016/j.jcyt.2014.11.001>
- Pescatore, F. M., Přestáno, C., & Kichikova, M. (2022). RBAC and its role with the immune system. *Alternative Therapies in Health and Medicine*, *28*(1), 8-10.
- Petrovics, G., Szigeti, G., Hamvas, S., Mate, A., Betlehem, J., & Hegyi, G. (2016). Controlled pilot study for cancer patients suffering from chronic fatigue syndrome due to chemotherapy treated with BioBran (MGN-3Arabinoxylane) and targeted radiofrequency heat therapy. *European Journal of Integrative Medicine*, *8*, 29-35. <https://doi.org/10.1016/j.eujim.2016.10.004>
- Salama, H., Medhat, E., Shaheen, M., Zekri, A.-R. N., Darwish, T., & Ghoneum, M. (2016). Arabinoxylan rice bran (Biobran) suppresses the viremia level in patients with chronic HCV infection: A randomized trial. *International Journal of Immunopathology and Pharmacology*, *29*(4), 647-653. <https://doi.org/10.1177/0394632016674954>
- Sudo, N., Tatoe, K., Koyama, N., Kanna, H., Hirayama, K., & Kubo, C. (2001). The basic study of alabinoxlan compound (MGN-3) on the activation of vital defence *Rinshou to Kenkyu (Clinical and Research)*, *78*(1), 193-196.

*Modified Rice Bran Arabinoxylan as a Nutraceutical in Health and Disease – A Scoping Review with Bibliometric Analysis*

---

- Takahara, K., & Sano, K. (2004). The life prolongation and QOL improvement effect of rice bran arabinoxylan derivative (MGN-3, Biobran) for progressive cancer. *Clinical Pharmacology and Therapy*, 14(3), 267-271.
- Tan, D. F. S., & Flores, J. A. S. (2020). The immunomodulating effects of arabinoxylan rice bran ( Lentin ) on hematologic profile, nutritional status and quality of life among head and neck carcinoma patients undergoing radiation therapy: A double blind randomized control trial. *Radiology Journal, The Official Publication of the Philippine College of Radiology*, 12(February), 11-16.
- Tazawa, K., Ichihashi, K., Fujii, T., Omura, K., Anazawa, M., & Maeda, H. (2003). The oral administration of the Hydrolysis Rice Bran (HRB) prevents a common cold syndrome in elderly people based on immunomodulatory function. *Journal of Traditional Medicines*, 20(3), 132-141.
- Tazawa, K., Namikawa, H., Oida, N., Itoh, K., Yatsuzuka, M., Koike, J., Masada, M., & Maeda, H. (2000). Scavenging activity of MGN-3 (arabinoxylane from rice bran) with natural killer cell activity on free radicals. *Biotherapy: Official journal of Japanese Society of Biological Response Modifiers*, 14(5), 493-495.
- Tsunekawa, H. (2004). Effect of long-term administration of immunomodulatory food on cancer patients completing conventional treatments. *Clinical Pharmacology and Therapy*, 14(3), 295-302.
- University Hospital Medical Information Network Center. (2010). *Radioprotective effects of the Hydrolyzed Rice Bran (HRB) on acute gastroenteritis for cervical cancer treated with chemoradiation*. University hospital Medical Information Network (UMIN) Center. [https://center6.umin.ac.jp/cgi-open-bin/ctr\\_e/ctr\\_view.cgi?recptno=R000005179](https://center6.umin.ac.jp/cgi-open-bin/ctr_e/ctr_view.cgi?recptno=R000005179)
- University Hospital Medical Information Network Center. (2018). *A single center, prospective and randomized controlled study of the efficacy and safety of MGN-3/BioBran for patients with B-cell non-Hodgkin's lymphoma after CR*. University hospital Medical Information Network (UMIN) Center. [https://center6.umin.ac.jp/cgi-open-bin/ctr\\_e/ctr\\_view.cgi?recptno=R000039342](https://center6.umin.ac.jp/cgi-open-bin/ctr_e/ctr_view.cgi?recptno=R000039342)
- Yamada, T., Daizo, A., Boindogurung, K., Egashira, Y., Maeda, H., & Sanada, H. (2002). Effects of enzyme-treated rice bran hemicellulose (MGN-3) on experimental liver injury in rats [Abstract] *Journal of Japanese Association for Dietary Fiber Research*, 6(2), 107-107. <https://doi.org/10.11217/jjdf1997.6.91>
- Yu, K. W., Shin, K. S., Choi, Y. M., & Suh, H. J. (2004). Macrophage stimulating activity of exo-biopolymer from submerged culture of *Lentinus edodes* with rice bran. *Journal of Microbiology and Biotechnology*, 14(4), 658-664.
- Zhao, Z., Cheng, W., Qu, W., & Wang, K. (2020). Arabinoxylan rice bran (MGN-3/Biobran) alleviates radiation-induced intestinal barrier dysfunction of mice in a mitochondrion-dependent

manner. *Biomedicine & Pharmacotherapy*, 124, 109855.  
<https://doi.org/10.1016/j.biopha.2020.109855>

Zheng, S., Sanada, H., Dohi, H., Hirai, S., & Egashira, Y. (2012a). Suppressive effect of modified arabinoxylan from rice bran (MGN-3) on D-galactosamine-induced IL-18 expression and hepatitis in rats. *Bioscience, Biotechnology, and Biochemistry*, 76(5), 942-946.  
<https://doi.org/10.1271/bbb.110968>

Zheng, S., Sugita, S., Hirai, S., & Egashira, Y. (2012b). Protective effect of low molecular fraction of MGN-3, a modified arabinoxylan from rice bran, on acute liver injury by inhibition of NF- $\kappa$ B and JNK/MAPK expression. *International Immunopharmacology*, 14(4), 764-769.  
<https://doi.org/10.1016/j.intimp.2012.10.012>

Zhu, X., Okubo, A., Igari, N., Ninomiya, K., & Egashira, Y. (2017). Modified rice bran hemicellulose inhibits vascular endothelial growth factor-induced angiogenesis in vitro via VEGFR2 and its downstream signaling pathways. *Bioscience of Microbiota, Food and Health*, 36(2), 45-53.  
<https://doi.org/10.12938/bmfh.16-016>
